# Supplementary material for: Understanding autism spectrum disorder and social functioning in children with neurofibromatosis type 1: protocol for a cross-sectional multimodal study
Source: PubMed Central journal article supplement — BMJ Open. 2019 Sep 26;9(9):e030601. doi: 10.1136/bmjopen-2019-030601 (PMC6773330; doi:10.1136/bmjopen-2019-030601), 2019-09-26
Supplement: bmjopen-2019-030601.draft_revisions.pdf [file bmjopen-2019-030601.draft_revisions.pdf]

# BMJ Open

BMJ Open is committed to open peer review. As part of this commitment we make the peer review history of every article we publish publicly available.

When an article is published we post the peer reviewers' comments and the authors' responses online. We also post the versions of the paper that were used during peer review. These are the versions that the peer review comments apply to.

The versions of the paper that follow are the versions that were submitted during the peer review process. They are not the versions of record or the final published versions. They should not be cited or distributed as the published version of this manuscript.

BMJ Open is an open access journal and the full, final, typeset and author-corrected version of record of the manuscript is available on our site with no access controls, subscription charges or pay-per-view fees (<http://bmjopen.bmj.com>).

If you have any questions on BMJ Open's open peer review process please email [editorial.bmjopen@bmj.com](mailto:editorial.bmjopen@bmj.com)

# BMJ Open

## Understanding autism spectrum disorder and social functioning in children with neurofibromatosis type 1: protocol for a cross-sectional multimodal study

|                               |                                                                                                                                                                                                                                                                                                                                                                                                                                                                                                                                                                                                                                                                                                                                                                                                                                                                                                                                                                                                                                                                                                                                                                                                                                                                                                                                                                                                                                                                                                                                                                                                                                                                                                                                                       |
|-------------------------------|-------------------------------------------------------------------------------------------------------------------------------------------------------------------------------------------------------------------------------------------------------------------------------------------------------------------------------------------------------------------------------------------------------------------------------------------------------------------------------------------------------------------------------------------------------------------------------------------------------------------------------------------------------------------------------------------------------------------------------------------------------------------------------------------------------------------------------------------------------------------------------------------------------------------------------------------------------------------------------------------------------------------------------------------------------------------------------------------------------------------------------------------------------------------------------------------------------------------------------------------------------------------------------------------------------------------------------------------------------------------------------------------------------------------------------------------------------------------------------------------------------------------------------------------------------------------------------------------------------------------------------------------------------------------------------------------------------------------------------------------------------|
| Journal:                      | <i>BMJ Open</i>                                                                                                                                                                                                                                                                                                                                                                                                                                                                                                                                                                                                                                                                                                                                                                                                                                                                                                                                                                                                                                                                                                                                                                                                                                                                                                                                                                                                                                                                                                                                                                                                                                                                                                                                       |
| Manuscript ID                 | bmjopen-2019-030601                                                                                                                                                                                                                                                                                                                                                                                                                                                                                                                                                                                                                                                                                                                                                                                                                                                                                                                                                                                                                                                                                                                                                                                                                                                                                                                                                                                                                                                                                                                                                                                                                                                                                                                                   |
| Article Type:                 | Protocol                                                                                                                                                                                                                                                                                                                                                                                                                                                                                                                                                                                                                                                                                                                                                                                                                                                                                                                                                                                                                                                                                                                                                                                                                                                                                                                                                                                                                                                                                                                                                                                                                                                                                                                                              |
| Date Submitted by the Author: | 22-Mar-2019                                                                                                                                                                                                                                                                                                                                                                                                                                                                                                                                                                                                                                                                                                                                                                                                                                                                                                                                                                                                                                                                                                                                                                                                                                                                                                                                                                                                                                                                                                                                                                                                                                                                                                                                           |
| Complete List of Authors:     | <p>Haebich, Kristina; Murdoch Childrens Research Institute, Child Neuropsychology<br/> Pride, Natalie; The Children's Hospital at Westmead, Institute for Neuroscience and Muscle Research; University of Sydney, Discipline of Paediatrics and Child Health, Faculty of Medicine<br/> Walsh, Karin; Children's National Health System<br/> Chisholm, Anita; Murdoch Childrens Research Institute, Child Neuropsychology<br/> Rouel, Melissa; The Children's Hospital at Westmead, Institute for Neuroscience and Muscle Research<br/> Maier, Alice; Murdoch Childrens Research Institute, Child Neuropsychology<br/> Anderson, Vicki; Murdoch Childrens Research Institute, Child Neuropsychology<br/> Barton, Belinda; The Children's Hospital at Westmead, Children's Hospital Education Research Institute; University of Sydney, Discipline of Paediatrics and Child Health, Faculty of Medicine<br/> Silk, Tim; Deakin University<br/> Korgaonkar, Mayuresh; University of Sydney, Brain Dynamics Centre, Westmead Institute for Medical Research<br/> Seal, Marc; Murdoch Childrens Research Institute, Clinical Sciences<br/> Lami, Francesca; Murdoch Childrens Research Institute, Child Neuropsychology<br/> Lorenzo, Jennifer; The Children's Hospital at Westmead, Institute for Neuroscience and Muscle Research<br/> Williams, Katrina; Monash University, Department of Paediatrics<br/> Dabscheck, Gabriel; Royal Children's Hospital Melbourne, Department of Neurology<br/> Rae, Caroline; Neuroscience Research Australia<br/> Kean, Michael; Royal Children's Hospital Melbourne<br/> North, Kathryn; Murdoch Childrens Research Institute<br/> Payne, Jonathan; Murdoch Childrens Research Institute, Child Neuropsychology</p> |
| Keywords:                     | Neurofibromatosis type 1, Magnetic resonance imaging < RADIOLOGY & IMAGING, Autism spectrum disorder, Social cognition, Social functioning                                                                                                                                                                                                                                                                                                                                                                                                                                                                                                                                                                                                                                                                                                                                                                                                                                                                                                                                                                                                                                                                                                                                                                                                                                                                                                                                                                                                                                                                                                                                                                                                            |
|                               |                                                                                                                                                                                                                                                                                                                                                                                                                                                                                                                                                                                                                                                                                                                                                                                                                                                                                                                                                                                                                                                                                                                                                                                                                                                                                                                                                                                                                                                                                                                                                                                                                                                                                                                                                       |

1  
2  
3  
4  
5  
6  
7  
8  
9  
10  
11  
12  
13  
14  
15  
16  
17  
18  
19  
20  
21  
22  
23  
24  
25  
26  
27  
28  
29  
30  
31  
32  
33  
34  
35  
36  
37  
38  
39  
40  
41  
42  
43  
44  
45  
46  
47  
48  
49  
50  
51  
52  
53  
54  
55  
56  
57  
58  
59  
60

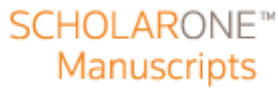

1  
2  
3 **Understanding autism spectrum disorder and social functioning in children with**  
4 **neurofibromatosis type 1: protocol for a cross-sectional multimodal study**  
5  
6  
7  
8

9 Kristina M Haebich,<sup>1</sup> Natalie A Pride,<sup>2,3</sup> Karin S Walsh,<sup>4</sup> Anita Chisholm,<sup>1,5</sup> Melissa Rouel,<sup>2</sup>  
10 Alice Maier,<sup>1</sup> Vicki Anderson,<sup>1,5</sup> Belinda Barton,<sup>2,3,6</sup> Tim Silk,<sup>1,7</sup> Mayuresh S Korgaonkar,<sup>8</sup>  
11 Marc L Seal,<sup>1,5</sup> Francesca Lami,<sup>1</sup> Jennifer Lorenzo,<sup>2</sup> Katrina Williams,<sup>9</sup> Gabriel Dabscheck,<sup>10</sup>  
12 Caroline D Rae,<sup>11,12</sup> Michael Kean,<sup>1</sup> Kathryn N North,<sup>1,5</sup> Jonathan M Payne<sup>1,5</sup>  
13  
14  
15  
16  
17  
18  
19  
20

21 <sup>1</sup> Murdoch Children's Research Institute, The Royal Children's Hospital, Parkville, VIC,  
22 Australia  
23  
24

25 <sup>2</sup> Kids Neuroscience Centre, The Children's Hospital at Westmead, NSW, Australia  
26  
27

28 <sup>3</sup> Discipline of Child and Adolescent Health, The University of Sydney Medical School, NSW,  
29 Australia  
30  
31

32 <sup>4</sup> Children's National Health System, Washington, DC, United States  
33  
34

35 <sup>5</sup> Department of Paediatrics, Faculty of Medicine, Dentistry and Health Science, University of  
36 Melbourne, Melbourne, VIC, Australia  
37  
38

39 <sup>6</sup> Children's Hospital Education Research Institute, The Children's Hospital at Westmead,  
40 NSW, Australia  
41  
42

43 <sup>7</sup> School of Psychology, Deakin University, VIC, Australia  
44  
45

46 <sup>8</sup> Brain Dynamics Centre, Westmead Institute for Medical Research, The University of  
47 Sydney Medical School, NSW, Australia  
48  
49

50 <sup>9</sup> Department of Paediatrics, Monash University, Clayton, VIC, Australia  
51  
52

53 <sup>10</sup> Department of Neurology, The Royal Children's Hospital, Parkville, VIC, Australia  
54  
55

56 <sup>11</sup> Neuroscience Research Australia, Randwick, NSW, Australia  
57  
58  
59  
60

1  
2  
3 <sup>12</sup> School of Medical Sciences, The University of New South Wales, Kensington, NSW,  
4  
5 Australia

6  
7  
8  
9  
10  
11 *Corresponding author:* Dr Jonathan Payne. Murdoch Children's Research Institute, The  
12  
13 Royal Children's Hospital, Flemington Road, Parkville VIC 3052, Australia.

14  
15  
16 Ph: +61 3 9936 6761

17  
18 Email: [jonathan.payne@mcri.edu.au](mailto:jonathan.payne@mcri.edu.au)  
19  
20  
21  
22  
23  
24  
25  
26  
27  
28  
29  
30  
31  
32  
33  
34  
35  
36  
37  
38  
39  
40  
41  
42  
43  
44  
45  
46  
47  
48  
49  
50  
51  
52  
53  
54  
55  
56  
57  
58  
59  
60

## ABSTRACT

**Introduction:** Children with the single-gene disorder neurofibromatosis type 1 (NF1) appear to be at an increased risk for autism spectrum disorder (ASD) and exhibit a unique social-cognitive phenotype compared to children with idiopathic ASD. A complete framework is required to better understand autism in NF1, from neurobiological levels through to behavioural and functional outcomes. The primary aims of this study are to establish the frequency of ASD in children with NF1, examine the social cognitive phenotype, investigate the neuropsychological processes contributing to ASD symptoms and poor social functioning in children with NF1, and to investigate novel structural and functional neurobiological markers of ASD and social dysfunction in NF1. The secondary aim of this study is to compare the neuropsychological and neurobiological features of ASD in children with NF1 to a matched group of patients with idiopathic ASD.

**Methods and analysis:** This is an international, multisite, prospective, cross-sectional cohort study of children with NF1, idiopathic ASD, and typically developing (TD) controls. Participants will be 200 children with NF1 (3-15 years of age), 70 TD participants (3-15 years), and 35 children with idiopathic ASD (7-15 years). Idiopathic ASD and NF1 cases will be matched on age, sex and intelligence. All participants will complete cognitive testing and parents will rate their child's behaviour on standardised questionnaires. Neuroimaging will be completed by a subset of participants aged seven years and older. Children with NF1 that screen at risk for ASD on the parent-rated Social Responsiveness Scale will be invited back to complete the Autism Diagnostic Observation Scale 2<sup>nd</sup> Edition and Autism Diagnostic Interview-Revised to determine whether they fulfil ASD diagnostic criteria.

**Ethics and dissemination:** This study has hospital ethics approval and the results will be disseminated through peer-reviewed publications and international conferences.

### Strengths and limitations of this study

- Gold standard assessment of autism spectrum disorder (ASD) using the clinician rated Autism Diagnostic Interview-Revised and the Autism Diagnostic Observation Scale 2<sup>nd</sup> Edition to determine the frequency of ASD in children with NF1.
- An explanatory framework for understanding ASD in NF1, incorporating markers of brain development and neurocognitive performance with behavioural symptoms and functional outcomes.
- This study will help guide the development and implementation of developmentally appropriate and effective interventions for children with NF1 and ASD or those with impairing social deficits.
- The relatively small number of idiopathic ASD participants (n = 35) may not capture the full extent of clinical heterogeneity in the condition limiting the ability to compare and contrast the ASD phenotype in NF1 to the idiopathic disorder.

## INTRODUCTION

Autism spectrum disorder (ASD) is a neurodevelopmental disorder characterised by impairments in social communication, restricted interests and repetitive behaviours that result in pervasive social challenges and reduced quality of life. In the general population, ASD is a heterogeneous disorder resulting from complex gene-environment interactions.<sup>1</sup> Genetic influences are a particularly strong component of ASD aetiology, evidenced by heritability estimates of 83-90% in recent meta-analyses of twin studies, and greater ASD concordance in the context of increased genetic relatedness.<sup>2,3</sup> Despite clear genetic underpinnings, there is striking genetic heterogeneity with over 1,000 candidate genes reported to be related to ASD.<sup>4,5</sup> Such aetiological complexity has proven a significant challenge in understanding the molecular and neurobiological mechanisms underlying this disorder.

In a subset of children, ASD co-occurs with a clinically defined syndrome, many of which arise from a known single gene mutation.<sup>6,7</sup> The significant reductions in genetic heterogeneity in these “syndromic” forms of ASD enables the molecular and neurobiological pathways critical to ASD to be better understood, making it possible to identify distinct neurodevelopmental subtypes of ASD within these monogenetic syndromes. One such syndrome is neurofibromatosis type 1 (NF1), an autosomal dominant disorder caused by loss-of-function mutations within the *NF1* gene. With a birth incidence of 1 in 2,700, NF1 is one of the most common monogenic disorders to affect the central nervous system.<sup>8</sup> Cognitive impairments are the greatest cause of morbidity in children with NF1, with up to 80% experiencing cognitive deficits in attention, executive function, visuoperception and language.<sup>9,10</sup>

Children with NF1 are at an increased risk for ASD. At the group level, recent meta-analysis has demonstrated large effects sizes for ASD symptomatology across eight studies of individuals with NF1 (Hedges'  $g=0.9$ ).<sup>11</sup> Results from a large international pooled dataset of



1  
2  
3 531 individuals with NF1 indicated that 39% of patients demonstrate at least sub-threshold  
4 ASD symptoms on the Social Responsiveness Scale 2<sup>nd</sup> edition (SRS-2), with 13% scoring  
5 in the most severe range.<sup>12</sup> To date, only a handful of studies have employed clinic-based  
6 assessments to establish the prevalence of ASD in NF1,<sup>13 14</sup> returning estimates of around  
7 25% in school-aged children; significantly higher than rates observed in the general  
8 population (approximately 1%).<sup>15</sup>  
9  
10  
11  
12  
13  
14  
15  
16  
17

18 Despite phenotypic similarities between children with NF1 and idiopathic ASD, including  
19 social interaction difficulties,<sup>16</sup> reduced theory of mind,<sup>17</sup> hyperactivity,<sup>18</sup> and anxiety,<sup>19</sup>  
20 differences are also observed.<sup>12 20</sup> For example, children with NF1 appear to demonstrate  
21 fewer repetitive behaviours and better language skills than children with idiopathic ASD.<sup>14</sup>  
22 Further, idiopathic ASD is often associated with intellectual impairment, whereas children  
23 with NF1-related ASD typically demonstrate intelligence estimates within the average  
24 range.<sup>10 13</sup> The strong male:female bias in idiopathic ASD (4:1)<sup>21</sup> also appears to be  
25 attenuated in NF1, with estimates at approximately 1.6-2.6:1.<sup>12 22</sup> On average, the age  
26 children with NF1 receive a diagnosis of ASD is 10.65 years,<sup>14</sup> which is significantly later  
27 than the idiopathic condition, which is around 4 years.<sup>23</sup> While these data suggest that  
28 autism symptoms are typically not identified by parents or health professionals of children  
29 with NF1 until 8-10 years of age,<sup>12 24</sup> the possible “masking role” of neurodevelopmental  
30 comorbidities such as attention deficit/hyperactivity disorder (ADHD) and the complex  
31 medical issues experienced by children with NF1 is unclear.  
32  
33  
34  
35  
36  
37  
38  
39  
40  
41  
42  
43  
44  
45  
46  
47  
48  
49

50 Despite the recent advances into understanding ASD in NF1 over the last few years, many  
51 critical questions remain. Indeed a complete explanatory framework for understanding ASD  
52 in a single-gene model such as NF1 requires multiple levels of analysis in order to delineate  
53 the effect of *NF1* mutation on gene expression, cell signalling, brain structure and function,  
54 and neurocognitive performance as well as behavioural symptoms and functional  
55 outcomes.<sup>25</sup> In NF1, loss of the gene product neurofibromin causes disinhibition of the RAS-  
56  
57  
58  
59  
60

1  
2  
3 MAPK signalling cascade, resulting in abnormal brain development.<sup>26 27</sup> Aberrant cellular  
4 signalling further triggers abnormal GABAergic neurotransmission, impaired long-term  
5 potentiation, and a loss of synaptic plasticity.<sup>28 29</sup> Presently, the neurobiological mechanisms  
6 underlying NF1-related ASD symptoms and functional impairments remain unclear. This  
7 study will explore the neurobiological, cognitive, behavioural and functional phenotype in  
8 children with NF1 and how each of these levels of analysis contribute to the ASD phenotype.  
9  
10 Further, the majority of research to date has estimated NF1-related ASD symptoms based  
11 on parent-reported measures. To provide obtain a deeper understanding of the ASD  
12 phenotype in NF1, we will use the current gold-standard combination of the clinician-rated  
13 Autism Diagnostic Interview-Revised (ADI-R) with the Autism Diagnostic Observation Scale  
14 2<sup>nd</sup> Edition (ADOS-2). These data will enable us to provide greater certainty in the ASD  
15 prevalence rate in NF1, and to identify potentially important similarities and differences  
16 between the symptom profiles of NF1-related ASD and idiopathic ASD.  
17  
18  
19  
20  
21  
22  
23  
24  
25  
26  
27  
28  
29  
30  
31  
32

33 The primary aims of this study are to (1) comprehensively phenotype ASD-like behaviours  
34 and establish the frequency of ASD in children with NF1, (2) examine the social cognitive  
35 phenotype of children with NF1, (3) identify the neuropsychological processes contributing to  
36 ASD symptoms and poor social functioning in children with NF1, and (4) investigate novel  
37 structural and functional neurobiological markers of ASD and social dysfunction in children  
38 with NF1. The secondary aim of this study is to compare cognitive and symptom profiles as  
39 well as neurobiological markers of ASD in children with NF1 to a matched group of patients  
40 with idiopathic ASD.  
41  
42  
43  
44  
45  
46  
47  
48  
49  
50

## 51 **METHODS AND ANALYSIS**

### 52 **Study design**

53  
54 This is an international, multisite, prospective, cross-sectional cohort study of children with  
55 NF1, idiopathic ASD, and typically developing (TD) controls. Participants will complete  
56 detailed assessment of their cognitive abilities, behaviour and adaptive functioning. As part  
57  
58  
59  
60

1  
2  
3 of this assessment, participants will be screened for ASD symptoms. All idiopathic ASD  
4 participants, as well as NF1 participants that screen *at risk* for ASD (defined below), will  
5 complete a comprehensive assessment which will be used to guide the formulation of  
6 research and clinical ASD diagnoses (see ASD assessment measures below for further  
7 details). Children aged  $\geq 7$  years will also be invited to undergo multimodal magnetic  
8 resonance imaging (MRI; Australian sites only). An overview of the study design for each  
9 group is provided in Figure 1.  
10  
11  
12  
13  
14  
15  
16  
17  
18  
19

---

20 *Insert Figure 1 here*

---

### 23 **Participants and recruitment**

24  
25  
26 Three groups will be recruited; children with NF1 (n=200; 3-15 years of age), children with  
27 idiopathic ASD (n=35; 7-15 years of age), and TD controls from the general population  
28 (n=80; 3-15 years of age). Prospective participants with NF1 will be recruited from three  
29 international genetic centres; (1) the Neurofibromatosis Clinic at the Royal Children's  
30 Hospital/Murdoch Children's Research Institute (MCRI), Melbourne, Australia; (2) the  
31 Neurogenetics Clinic at The Children's Hospital at Westmead (CHW), Sydney, Australia; and  
32 (3) the Gilbert Neurofibromatosis Institute at the Children's National Health System,  
33 Washington DC, USA. Children are referred to these clinics by general practitioners and  
34 medical specialists for evaluation, diagnosis, and management of NF1. These clinics operate  
35 on similar guidelines, are specialist centres for the multidisciplinary care of individuals with  
36 NF1, and service clinical populations thought to be representative of the wider NF1  
37 community. NF1 participants will be diagnosed with NF1 by an expert neurologist or clinical  
38 geneticist based on criteria specified by the National Institutes of Health Conference  
39 Statement.<sup>30</sup> The study coordinator at each site will recruit NF1 participants. The coordinator  
40 will approach families attending the clinic and inquire about interest in the study. To minimise  
41  
42  
43  
44  
45  
46  
47  
48  
49  
50  
51  
52  
53  
54  
55  
56  
57  
58  
59  
60

1  
2  
3 selection bias, the study coordinator will sequentially approach families with a child in the  
4 defined age range.  
5  
6  
7  
8

9 Participants with idiopathic ASD will be recruited at the MCRI site from local clinical services  
10 and from families known to existing studies who have previously indicated a willingness to  
11 be contacted for future research. All idiopathic ASD participants will have received an ASD  
12 diagnosis by a clinician prior to enrolment and have no known genetic disorders associated  
13 with ASD. They will be matched to NF1 participants with a comorbid diagnosis of ASD on  
14 age, sex and intelligence. Given that approximately 94% of children with NF1 present with  
15 an IQ >70,<sup>31</sup> the majority of recruited children with idiopathic ASD will not have evidence of  
16 an intellectual disability based on records of intellectual function to provide a suitable match.  
17  
18  
19  
20  
21  
22  
23  
24  
25  
26  
27

28 Control participants will be recruited via several methods. First, we will invite individuals that  
29 have participated as TD controls in previous research studies and provided consent to be re-  
30 contacted for future studies. Contact will initially take the form of a mail out of the Parent  
31 Information and Consent Form and a cover letter inviting them to contact the site study  
32 coordinator if they would like to participate. A follow-up phone call will be made two weeks  
33 later to ascertain interest in participating. Second, approved advertisements will be placed  
34 on hospital noticeboards inviting interested participants to contact the site investigator for  
35 more information about the study.  
36  
37  
38  
39  
40  
41  
42  
43  
44  
45  
46

47 Exclusion criteria for all participants are:

- 49 • Participant and at least one parent/guardian not fluent in English.
- 51 • Significant sensory impairment that limits the validity of psychometric testing.
- 53 • Symptomatic intracranial pathology that may impact cognitive and  
55 behavioural function, such as an acquired brain injury, hydrocephalus, or  
57  
58  
59  
60

1  
2  
3 progressive intracranial tumours (children with asymptomatic lesions such as  
4  
5 optic gliomas will be eligible).  
6  
7  
8

9 Additional exclusion criteria that applies to TD control participants only:

- 11 • Positive history of a neurological, genetic, or psychological disorder.
- 12 • Developmental delay/intellectual disability.
- 13
- 14
- 15
- 16
- 17

18 The first participant was recruited to this study in June 2016 and we anticipate the end date  
19 for enrolment to be December 2020.  
20  
21  
22

## 23 **Procedure**

24  
25 Once informed consent has been obtained, parents/caregivers will complete a semi-  
26  
27 structured interview with a member of the study team which will determine eligibility, confirm  
28  
29 demographic details (date of birth, language spoken at home, school grade), obtain  
30  
31 socioeconomic information (primary caregiver's highest level of education, occupation, and  
32  
33 employment status), and a detailed developmental/medical history will also be taken. Eligible  
34  
35 children will then undergo cognitive assessment individually with a site psychologist in a  
36  
37 quiet room. Study personnel will follow a test administration protocol to minimise between-  
38  
39 site variation. Children exhibiting fatigue during the assessment will complete the testing  
40  
41 over multiple days.  
42  
43  
44  
45  
46

47  
48 Parents/caregivers will complete detailed questionnaires covering a range of behavioural  
49  
50 and functional outcomes, including the SRS-2 (see Table 2). NF1 and TD control  
51  
52 participants that screen at risk for ASD on the basis of their SRS-2 results (total symptom T-  
53  
54 score  $\geq 60$ ) will be invited to complete the diagnostic ASD assessment. Idiopathic ASD  
55  
56 participants will also complete the ASD assessment so that a comprehensive understanding  
57  
58 of their behavioural profile can be obtained. These will be audiotaped and videotaped  
59  
60

1  
2  
3 respectively, so that independent blinded double interrater coding can be completed in 25%  
4  
5 of the sample.  
6  
7  
8

9 Children aged  $\geq 7$  years that are able to complete a brain MRI safely will be offered the  
10 option to undergo neuroimaging. Neuroimaging will only take place at Australian sites.  
11  
12  
13

## 14 15 **Measures**

### 16 17 *Cognitive and behavioural measures*

18  
19 Cognitive domains selected for assessment are based on a biopsychosocial model for social  
20 functioning that integrates abilities thought to underlie the development and expression of  
21 social behaviour, including attention/executive function, communication, and social cognitive  
22 skills.<sup>32</sup> To ensure appropriate age-normed tests are administered, participants will be  
23 grouped into a younger cohort of children aged 3-5 years, and a school-aged cohort of  
24 children aged 6-15 years. Child-direct assessment measures for each cohort are presented  
25 in Table 1. Parent reported measures are outlined in Table 2.  
26  
27  
28  
29  
30  
31  
32  
33  
34  
35  
36

---

37 *Insert Tables 1 & 2 here*

---

### 38 39 40 41 *ASD assessment measures*

42  
43 The ADI-R<sup>33</sup> is a semi-structured, standardised diagnostic interview designed to assess core  
44 aspects of ASD. The ADI-R is administered to a parent/caregiver by a trained clinician and  
45 consists of 95 items covering current and past behaviour, across the areas of family  
46 background, developmental history, language, communication, social development, interests  
47 and general behaviour. Items are coded according to the examiner's judgement of the  
48 presence/absence or the extent of a given behaviour using a scale ranging from 0  
49 (behaviour not present) to 3 (definite abnormality, marked in severity). An algorithm is used  
50 to code summary scores for the three domains required for diagnosis: social interaction,  
51  
52  
53  
54  
55  
56  
57  
58  
59  
60

1  
2  
3 communication and restricted and repetitive behaviours. Diagnostic criteria for ASD are met  
4  
5 when all three domain scores exceed the following cut-offs: social interaction domain  $\geq 10$ ;  
6  
7 communication  $\geq 8$ ; and restricted interests and repetitive behaviours  $\geq 3$ . The ADI-R is  
8  
9 effective in differentiating groups of children with and without ASD, and discriminating autism  
10  
11 symptomology.<sup>34</sup>  
12  
13

14  
15  
16 The ADOS-2<sup>35</sup> is a semi-structured, standardised child-direct observational assessment  
17  
18 designed to assess reciprocal social interaction and communication, play, and use of  
19  
20 imagination. It consists of four modules, of which one will be administered depending on the  
21  
22 participant's developmental age and expressive language ability: (1) preverbal/have single  
23  
24 word language; (2) phrase speech abilities; (3) verbally fluent children/adolescents; and (4)  
25  
26 verbally fluent adolescents/adults. Each module takes approximately 30 minutes to complete  
27  
28 by a trained examiner. For each module, individual items are scored on a three point scale  
29  
30 ranging from 0 (no evident abnormality) to 3 (marked abnormality). Module observations are  
31  
32 scored according to the ADOS-2 diagnostic algorithm under two domains; social affect and  
33  
34 restricted and repetitive behaviours. A combined domain total of  $\geq 7$  is classified as meeting  
35  
36 diagnostic criteria for ASD, consistent with DSM-5.<sup>35</sup>  
37  
38  
39  
40

41  
42 If the results of the ADI-R and ADOS-2 are not in agreement regarding ASD classification,  
43  
44 we will employ the research criteria proposed by Risi and colleagues to resolve ADI-R and  
45  
46 ADOS-2 discordance.<sup>36</sup> Use of these criteria relax the original ADI-R criteria that were  
47  
48 developed to detect the formerly defined Autistic Disorder,<sup>34</sup> to encompass the broader  
49  
50 category of ASD outlined in the DSM-V. A research diagnosis of ASD is thus assigned to a  
51  
52 participant if he/she meets criteria on the ADOS-2 (either autism or autism spectrum) and  
53  
54 meets one of the following criteria on the ADI-R:

- 55  
56 1. Meets ASD cut-off for the social reciprocity domain and either communication or  
57  
58 restricted interests and repetitive behaviours domains;
- 59  
60 2. Comes within one point for both social reciprocity and communication domains;

- 1  
2  
3 3. Meets ASD cut-off on one domain (either social reciprocity or communication) and  
4 comes within two points of the cut-off on the other domain (either social reciprocity or  
5 communication).  
6  
7  
8  
9

10  
11 In addition to a research classification, a multi-disciplinary team will establish a clinical  
12 consensus diagnosis for all participants with NF1 who have completed the ASD assessment.  
13 This consensus diagnosis will be made according to DSM-V guidelines, using all available  
14 diagnostic information.  
15  
16  
17  
18  
19

## 20 21 22 **Neuroimaging procedure**

### 23 *Mock training*

24 At the MCRI site, children will complete a 30 minute training session in a mock MRI scanner  
25 which reproduces the physical environment of the real scanner including noise effects. This  
26 familiarises participants to the MRI environment, lowers anxiety and provides practice at  
27 keeping still during the scanning session.<sup>37</sup> Children who find the training sessions  
28 distressing and wish to withdraw from the neuroimaging component may do so at any time  
29 without affecting their ability to participate in the cognitive and behavioural assessment.  
30  
31  
32  
33  
34  
35  
36  
37  
38  
39

### 40 *MRI scan*

41 Neuroimaging data will be obtained on a 3-Tesla Siemens MAGNETOM Prisma MRI  
42 scanner with a 64-channel head coil at both MCRI and CHW sites. The magnetic resonance  
43 spectroscopy sequences, which will only be conducted at MCRI, will use a 32-channel head  
44 coil. The neuroimaging protocol comprises structural and functional sequences which will be  
45 completed in two 45 minute sessions with a 30 minute break in between (MCRI site) or in  
46 one 45 minute session (CHW site). See Table 3 for sequence details.  
47  
48  
49  
50  
51  
52  
53  
54  
55  
56  
57

### 58 *Structural neuroimaging*

59  
60



1  
2  
3 Three dimensional high-resolution structural T1-weighted magnetization prepared rapid  
4 gradient-echo (MPRAGE) images will be acquired to provide whole brain and regional grey  
5 and white matter (WM) volume, cortical thickness and other morphological features, as  
6 outlined in Table 3. Children exhibiting high levels of movement during the MPRAGE  
7 sequence, will complete a second T1-weighted multi-echo magnetization prepared rapid  
8 gradient-echo (MEMPRAGE) sequence, which uses navigator based prospective motion  
9 correction to reduce artefact and improve structural image contrast, providing more accurate  
10 tissue segmentation.<sup>37-39</sup>

11  
12 A T2-SPACE (Sampling Perfection with Application optimized Contrast with flip angle  
13 Evolution) protocol will be acquired to obtain T2-weighted anatomical images and provide  
14 information about the number and location of focal areas of WM hyperintensity that are  
15 common in NF1 (Table 3).<sup>27 40-42</sup> The relationship between focal areas of high intensity and  
16 cognitive and behavioural deficits remains unclear.<sup>27 43</sup>

---

34 *Insert Table 3 here*

---

#### 38 *Multi-band, multi-shell diffusion neuroimaging*

39 A multi-band accelerated EPI sequences protocol, developed by the Centre for Magnetic  
40 Resonance Research (CMRR, University of Minnesota), will be acquired in order to obtain  
41 diffusion-weighted images (DWI) and examine brain microstructure through the identification  
42 of WM fibre tracts and their directionality. DWI measures the direction and extent of water  
43 diffusion through brain tissue, which is dependent on the underlying tissue structure,  
44 permitting examination of differences in cellular structure.<sup>44 45</sup> Diffusion parameters indicate  
45 changes in axonal properties.<sup>44 45</sup> The multi-band accelerated EPI protocol uses multiple  
46 shell acquisition to accelerate DWI volume coverage, and involves anterior-posterior phase  
47 encoding direction as well as standard and reverse phase encoded blipped image  
48  
49  
50  
51  
52  
53  
54  
55  
56  
57  
58  
59  
60

1  
2  
3 acquisition to correct for magnetic susceptibility-induced distortions related to the EPI  
4 acquisitions.<sup>37 46 47</sup> Three diffusion weighted shells will be acquired (Table 3) to perform  
5 tractography and estimate WM microstructure, including traditional tensor metrics (fractional  
6 anisotropy, and mean, radial and axial diffusivity), as well as more advanced techniques that  
7 provide greater specificity to the microstructural properties, such as fibre density.  
8  
9  
10  
11  
12  
13  
14  
15

### 16 *Multi-band resting state functional neuroimaging*

17 Resting state functional MRI (rs-fMRI) will be used to measure intrinsic functional  
18 connectivity between brain regions while subjects are at rest. During the sequence,  
19 participants are instructed to look at a white fixation cross on a black screen (Table 3).  
20 Resting state connectivity is useful for studying abnormal neural network connectivity in NF1,  
21 and its relationship with cognitive and behavioral deficits.<sup>48</sup>  
22  
23  
24  
25  
26  
27  
28  
29

### 30 *Magnetic resonance spectroscopy*

31 Magnetic resonance spectroscopy (MRS) is an *in vivo* tool capable of non-invasively  
32 measuring brain metabolites. The MCRI site only will acquire two GABA-edited magnetic  
33 resonance spectra using the localised spectroscopy sequence MEGA-PRESS, developed by  
34 CMRR, to evaluate the animal model-derived hypothesis that alterations in GABA and  
35 glutamate systems underlie cognitive and social impairments in NF1.<sup>49-51</sup> MEGA-PRESS  
36 allows separation of GABA signals from stronger overlying signals of other metabolites.<sup>52</sup>  
37 Voxels will be positioned in regions with consistency of field homogeneity within the  
38 prefrontal cortex (PFC) and the right temporoparietal junction (rTPJ), both of which are  
39 integral regions within the social brain network.<sup>53 54</sup> The PFC voxel will be placed across the  
40 midline of the pre-central sulcus, crossing across both hemispheres, in the medial prefrontal  
41 cortex. The rTPJ voxel will be placed towards the rear border of the temporal and parietal  
42 lobes, in the posterior cerebral cortex. T1-weighted images will be used to guide MRS voxel  
43 placement.  
44  
45  
46  
47  
48  
49  
50  
51  
52  
53  
54  
55  
56  
57  
58  
59  
60

## Data analysis

Descriptive statistics will be used to establish the frequency of ASD in children with NF1.

Between-group differences on general and social cognitive measures will be examined using analysis of covariance (ANCOVA), controlling for type 1 error and covariates where appropriate (e.g., age, sex, socioeconomic status, IQ).

Within-group analysis for NF1 participants will identify the neuropsychological processes contributing to ASD symptoms and poor social functioning using (linear or logistic as appropriate) regressions within each age cohort. Composite variables will be created for variables that have high collinearity within the same domain. Regression models will be conducted separately for ASD symptomatology and social functioning as dependent variables. Only explanatory variables that significantly correlate with the dependent variables will be entered into each regression model, with a maximum of five predictor variables per model. Variables with the strongest correlation will be selected for the regression model.

Correlation and regression analyses will be used to identify associations between structural and functional brain markers, with cognitive, behavioural and ASD outcomes. To address the secondary aim, which is to compare the neuropsychological profiles as well as brain structure and function of children with NF1 and comorbid ASD to idiopathic ASD, statistical analyses examining group differences (ANCOVA and independent *t*-tests) between the idiopathic ASD and a subgroup of participants with NF1 and comorbid ASD will be conducted.

## Sample size

### *Cognitive and behavioural outcomes*

We anticipate NF1 versus TD control between-group effect sizes to range from 0.65-1.0

(Cohen's *d*) on estimates of general and social cognitive outcomes in previous studies.<sup>9 11 17</sup>

In order to detect a  $d=0.65$  difference between the NF1 and TD control groups on continuous

1  
2  
3 outcomes, with a minimum of 85% power and a significance level of 0.05, we need to recruit  
4 at least 35 children/group. Within-group analyses performed within the NF1 group will  
5 require a larger sample to attain adequate power. For a multiple regression, with five  
6 independent variables in the model, accounting for an effect size ( $f^2$ ) of 0.2, power will be  
7 sufficiently high ( $\beta=0.8$ ) with a sample size of 70. We thus require a minimum of 70  
8 participants with NF1 in each age cohort. However, in order to attain a large enough NF1  
9 with comorbid ASD subgroup ( $n=35$ ) for comparisons with TD control and idiopathic ASD  
10 groups, we estimate approximately 200 children with NF1 will be needed to be enrolled in  
11 the study. This assumes that 17-18% of children with NF1 screened on study will be  
12 diagnosed with comorbid ASD.  
13  
14  
15  
16  
17  
18  
19  
20  
21  
22  
23

### 24 25 26 *Neuroimaging outcomes*

27  
28 Published data demonstrate large effect sizes when comparing DWI and fMRI measures in  
29 individuals with NF1 to TD controls.<sup>55-57</sup> Between-group independent *t*-tests will be  
30 adequately powered ( $\beta=0.80$ ) to detect medium-to-large effect sizes (Cohen's  $d=0.68$ ) with a  
31 minimum sample of  $n=35$  per group. For the correlational analyses of DWI, rs-fMRI and  
32 behavioural data within the NF1 sample, power will be sufficiently high ( $\beta=0.8$ ) to detect  
33 moderate association ( $r\geq.4$ ) with a NF1 sample of 45.<sup>58</sup>  
34  
35  
36  
37  
38  
39  
40  
41  
42

### 43 *Secondary outcomes*

44  
45 We will recruit 35 idiopathic ASD participants. Sample size is based on (1) ANCOVA power  
46 analyses described above which indicate a sample size of 35 per group is sufficient to  
47 determine group differences on social cognitive measures; and (2) a previously published  
48 neuroimaging study involving 10 idiopathic ASD and 22 control participants which reported  
49 significant group differences in brain structure using structural MRI techniques.<sup>88</sup>  
50  
51  
52  
53  
54  
55  
56  
57

### 58 **Patient and public involvement**

1  
2  
3 Neither patient nor the public were involved in the development of the research questions,  
4  
5 selection of outcome measures, study design or study conduct.  
6  
7  
8

## 9 **ETHICS AND DISSEMINATION**

10  
11 This study has been granted approval by the Human Research Ethics Committee of the  
12  
13 Royal Children's Hospital (HREC35118), Sydney Children's Hospitals Network, and the  
14  
15 Institutional Review Board of the Children's National Health System. Any protocol  
16  
17 modifications will be communicated to the study team and ethics committees. This study will  
18  
19 be conducted in compliance with this protocol, the conditions of the ethics committee  
20  
21 approval, the NHMRC National Statement on ethical Conduct in Human Research (2007),  
22  
23 and the Note for Guidance on Good Clinical Practice (CPMP/ICH-135/95). Written informed  
24  
25 consent will be obtained from all participants. During the informed consent process, a  
26  
27 member of the research team will provide information about the study including the study  
28  
29 objectives, potential risks and benefits, inconveniences, and the participants' rights and  
30  
31 responsibilities. Questions about the study will be addressed in detail. As participants are  
32  
33 minors, written informed consent will be obtained from their parent/legal guardian.  
34  
35  
36  
37  
38

39 The findings of this study will be presented at conferences and published in peer-reviewed  
40  
41 journals. Only aggregated data will be reported in publications and presentations with  
42  
43 individual identifying information removed. The investigator team will write all articles  
44  
45 submitted for peer-reviewed publications and authorship inclusion and order will be guided  
46  
47 by levels of contribution.  
48  
49  
50

## 51 **Discussion**

52  
53 ASD is a highly complex polygenic disorder in which children experience significant  
54  
55 impairments in social interaction, communication and restricted interests and repetitive  
56  
57 behaviours. However, the aetiology of these impairments remains poorly understood, which  
58  
59 limits insights into neurobiological mechanisms and in turn, targeted pharmacological  
60

1  
2  
3 treatment. Studying ASD in children with NF1 offers a complementary approach to studying  
4 the idiopathic population by allowing us to systematically explore whether there are distinct  
5 neurobiological, cognitive and behavioural ASD phenotypes related to mutation at *NF1*.  
6  
7

8  
9 There will be a number of important novel outcomes from this study. First, it will combine  
10 gold standard diagnostic assessments with extensive cognitive and behavioural phenotyping  
11 to estimate the frequency of ASD and characterise the problem behaviours in children with  
12 NF1 as young as three years of age. Second, this study will characterise the social  
13 phenotype of NF1 and model the interrelationships between various levels of social  
14 functioning (e.g., social interactions, information processing and adjustment), and how  
15 abnormal functioning is associated with ASD symptomatology. Third, this study seeks to  
16 map brain structure and function onto a comprehensive set of cognitive, behavioural, and  
17 functional outcomes, encompassing general and social cognition, ASD symptom profiles,  
18 academic achievement, and adaptive functioning. By identifying the neurobiological and  
19 cognitive factors influencing functional outcomes, there is potential to provide insight into  
20 whether the genetic homogeneity in NF1 results in a unique, more consistent behavioural  
21 and cognitive phenotype than that seen in the idiopathic ASD population. Characterisation of  
22 the cognitive, behavioural and neurobiological phenotype in NF1-related ASD may assist in  
23 determining novel targets for future intervention studies aimed at improving social outcomes  
24 in ASD, as well as clinical populations with social difficulties more broadly, to improve patient  
25 outcomes. Finally, identifying neural correlates of social dysfunction and ASD in NF1 may  
26 provide researchers with valid surrogate endpoints for clinical trials, which would be  
27 particularly useful in proof of concept pilot studies and to assist optimising aspects of trial  
28 design such as dose refinement.  
29  
30  
31  
32  
33  
34  
35  
36  
37  
38  
39  
40  
41  
42  
43  
44  
45  
46  
47  
48  
49  
50  
51  
52  
53  
54  
55  
56  
57  
58  
59  
60

**Authors' contributions**

JP, NP, KSW, BB and KNN developed the original concept of the study, wrote the grant applications and drafted the original protocol and methodology. VA, KW, MSK, CR and MK provided additional advice on the study design, analysis techniques and/or statistical methods. All authors commented on the final preparation of the protocol and have read and approved the final manuscript.

**Funding statement**

This work was supported by a US Department of Defense Investigator Initiated Research Award and an Exploration-Hypothesis Development Award as part of the Neurofibromatosis Research Program, respective grant numbers W81XWH-15-1-0619 & W81XWH-16-1-0408; a Murdoch Children's Research Institute Clinician Scientist Fellowship awarded to Dr Payne; a NHMRC Postgraduate Scholarship awarded to Ms Chisholm; and the Children's Tumour Foundation in Australia.

**Competing interests**

All authors declare they have no competing interests.

**Word count:** 4142

## REFERENCES

1. Tordjman S, Somogyi E, Coulon N, *et al*. Gene × environment interactions in autism spectrum disorders: role of epigenetic mechanisms. *Front Psychiatry* 2014;5:53.
2. Sandin S, Lichtenstein P, Kuja-Halkola R, *et al*. The heritability of autism spectrum disorder. *JAMA* 2017;318:1182-4.
3. Tick B, Bolton P, Happé F, *et al*. Heritability of autism spectrum disorders: a meta-analysis of twin studies. *J Child Psychol Psychiatry* 2016;57:585-95.
4. Anney R, Klei L, Pinto D, *et al*. Individual common variants exert weak effects on the risk for autism spectrum disorders. *Hum Mol Genet* 2012;21:4781-92.
5. Buxbaum JD, Daly MJ, Devlin B, *et al*. The autism sequencing consortium: large-scale, high-throughput sequencing in autism spectrum disorders. *Neuron* 2012;76:1052-6.
6. Pinto D, Delaby E, Merico D, *et al*. Convergence of genes and cellular pathways dysregulated in autism spectrum disorders. *Am J Med Genet A* 2014;94:677-94.
7. Winden KD, Ebrahimi-Fakhari D, Sahin M. Abnormal mTOR activation in autism. *Annu Rev Neurosci* 2018;41:1-23.
8. Evans DG, Howard E, Giblin C, *et al*. Birth incidence and prevalence of tumor-prone syndromes: estimates from a UK family genetic register service. *Am J Med Genet A* 2010;152A:327-32.
9. Hyman SL, Shores EA, North KN. The nature and frequency of cognitive deficits in children with neurofibromatosis type 1. *Neurology* 2005;65:1037-44.
10. Lehtonen A, Howie E, Trump D, *et al*. Behaviour in children with neurofibromatosis type 1: cognition, executive function, attention, emotion, and social competence. *Dev Med Child Neurol* 2012;55:111-25.
11. Chisholm AK, Anderson VA, Pride NA, *et al*. Social function and autism spectrum disorder in children and adults with neurofibromatosis type 1: a systematic review and meta-analysis. *Neuropsychol Rev* 2018;28:317-40.



12. Morris SM, Acosta MT, Garg S, *et al.* Disease burden and symptom structure of autism in neurofibromatosis type 1: a study of the International NF1-ASD Consortium Team (INFACT). *JAMA Psychiatry* 2016;73:1276-84.
13. Garg S, Green J, Leadbitter K, *et al.* Neurofibromatosis type 1 and autism spectrum disorder. *Pediatrics* 2013;132:e1642-8.
14. Plasschaert E, Descheemaeker M-J, Van Eylen L, *et al.* Prevalence of autism spectrum disorder symptoms in children with neurofibromatosis type 1. *Am J Med Genet B* 2015;168B:72-80.
15. Lai MC, Lombardo MV, Baron-Cohen S. Autism. *Lancet* 2014;383:896-910.
16. Noll RB, Reiter-Purtill J, Moore BD, *et al.* Social, emotional, and behavioral functioning of children with NF1. *Am J Med Genet A* 2007;143A:2261-73.
17. Payne JM, Porter MA, Pride NA, *et al.* Theory of mind in children with neurofibromatosis type 1. *Neuropsychology* 2016;30:439-48.
18. Payne JM, Hyman SL, Shores EA, *et al.* Assessment of executive function and attention in children with neurofibromatosis type 1: relationships between cognitive measures and real-world behavior. *Child Neuropsychol* 2011;17:313-29.
19. Wang DL, Smith KB, Esparza S, *et al.* Emotional functioning of patients with neurofibromatosis tumor suppressor syndrome. *Genet Med* 2012;14:977-82.
20. Garg S, Plasschaert E, Descheemaeker M-J, *et al.* Autism spectrum disorder profile in neurofibromatosis type I. *J Autism Dev Disorders* 2015;45:1649-57.
21. Christensen DL, Baio J, Van Naarden Braun K, *et al.* Prevalence and Characteristics of Autism Spectrum Disorder Among Children Aged 8 Years - Autism and Developmental Disabilities Monitoring Network, 11 Sites, United States, 2012. *MMWR Surveill Summ* 2016;65:1-23.
22. Garg S, Heuvelman H, Huson S, *et al.* Sex bias in autism spectrum disorder in neurofibromatosis type 1. *J Neurodev Disord* 2016;8:26.

- 1  
2  
3 23. Bent CA, Dissanayake C, Barbaro J. Mapping the diagnosis of autism spectrum  
4  
5 disorders in children aged under 7 years in Australia, 2010-2012. *Med J Aust*  
6  
7 2015;202:317-20.  
8
- 9 24. Klein-Tasman BP, Janke KM, Luo W, *et al.* Cognitive and psychosocial phenotype of  
10  
11 young children with neurofibromatosis-1. *J Int Neuropsychol Soc* 2014;20:88-98.  
12
- 13 25. Pennington BF, Welsh M. Neuropsychology and developmental psychopathology. *J*  
14  
15 *Child Psychol Psychiatry* 1995;37:51-87.  
16
- 17 26. Wang Y, Kim E, Wang X, *et al.* ERK inhibition rescues defects in fate specification of  
18  
19 Nf1-deficient neural progenitors and brain abnormalities. *Cell* 2012;150:816-30.  
20
- 21 27. Payne JM, Moharir MD, Webster R, *et al.* Brain structure and function in  
22  
23 neurofibromatosis type 1: current concepts and future directions. *J Neurol Neurosurg*  
24  
25 *Psychiatry* 2010;81:304-9.  
26  
27
- 28 28. Violante IR, Patricio M, Bernardino I, *et al.* GABA deficiency in NF1: a multimodal [11C]-  
29  
30 flumazenil and spectroscopy study. *Neurology* 2016;87:897-904.  
31  
32
- 33 29. Cui Y, Costa RM, Murphy GG, *et al.* Neurofibromin regulation of ERK signaling  
34  
35 modulates GABA release and learning. *Cell* 2008;135:549-60.]  
36
- 37 30. National Institutes of Health Consensus Development Conference. Neurofibromatosis  
38  
39 Conference Statement. *Arch Neurol* 1988;45:575-8.  
40
- 41 31. Payne JM, North KN. Neurofibromatosis type 1. In: Reynolds SGSR, ed. Handbook of  
42  
43 Neurodevelopmental and Genetic Disorders in Children. 2nd Edition. New York:  
44  
45 Guilford Press 2010:322-37.  
46  
47
- 48 32. Beauchamp MH, Anderson V. SOCIAL: an integrative framework for the development of  
49  
50 social skills. *Psychol Bull* 2010;136:39-64.  
51
- 52 33. Le Couteur A, Lord C, Rutter M. The Autism Diagnostic Interview-Revised (ADI-R). Los  
53  
54 Angeles, CA: Western Psychological Services 2003.  
55
- 56 34. Rutter M, Le Couteur A, Lord C. ADI-R: Autism Diagnostic Interview-Revised (ADI-R).  
57  
58 Los Angeles, CA: Western Psychological Services 2003.  
59  
60

- 1  
2  
3 35. Lord C, Rutter M, DiLavore PC, *et al.* Autism Diagnostic Observation Schedule, 2nd  
4  
5 Edition: ADOS-2. Torrance: Western Psychological Services 2012.  
6  
7 36. Risi S, Lord C, Gotham K, *et al.* Combining information from multiple sources in the  
8  
9 diagnosis of autism spectrum disorders. *J Am Acad Child Adolesc Psychiatry*  
10  
11 2006;45:1094-103.  
12  
13 37. Silk TJ, Vilgis V, Adamson C, *et al.* Abnormal asymmetry in frontostriatal white matter in  
14  
15 children with attention deficit hyperactivity disorder. *Brain Imaging Behav*  
16  
17 2016;10:1080-9.  
18  
19 38. Tisdall MD, Hess AT, Reuter M, *et al.* Volumetric navigators for prospective motion  
20  
21 correction and selective reacquisition in neuroanatomical MRI. *Mag Reson Med*  
22  
23 2012;68:389-99.  
24  
25 39. van der Kouwe AJW, Benner T, Salat DH, *et al.* Brain morphometry with multiecho  
26  
27 MPRAGE. *NeuroImage* 2008;40:559-69.  
28  
29 40. van Es S, North KN, McHugh K, *et al.* MRI findings in children with neurofibromatosis  
30  
31 type 1: a prospective study. *Pediatr Radiol* 1996;26:478-87.  
32  
33 41. Sevick RJ, Barkovich AJ, Edwards MS, *et al.* Evolution of white matter lesions in  
34  
35 neurofibromatosis type 1: MR findings. *Am J Roentgenol* 1992;159:171-5.  
36  
37 42. Lopes Ferraz Filho JR, Munis MP, Soares Souza A, *et al.* Unidentified bright objects on  
38  
39 brain MRI in children as a diagnostic criterion for neurofibromatosis type 1. *Pediatr*  
40  
41 *Radiol* 2008;38:305-10.  
42  
43 43. DiPaolo DP, Zimmerman RA, Rorke LB, *et al.* Neurofibromatosis type 1: pathologic  
44  
45 substrate of high-signal-intensity foci in the brain. *Radiology* 1995;195:721-4.  
46  
47 44. Hagmann P, Jonasson L, Maeder P, *et al.* Understanding diffusion MR imaging  
48  
49 techniques: from scalar diffusion-weighted imaging to diffusion tensor imaging and  
50  
51 beyond. *Radiographics* 2006;26:S205-23.  
52  
53 45. Le Bihan D, Mangin JF, Poupon C, *et al.* Diffusion tensor imaging: concepts and  
54  
55 applications. *J Magn Reson imaging* 2001;13:534-46.  
56  
57  
58  
59  
60

- 1  
2  
3 46. Auerbach EJ, Xu J, Yacoub E, *et al.* Multiband accelerated spin-echo echo planar  
4  
5 imaging with reduced peak RF power using time-shifted RF pulses. *Magn Reson*  
6  
7 *Med* 2013;69:1261-7.  
8
- 9 47. Xu J, Moeller S, Auerbach EJ, *et al.* Evaluation of slice accelerations using multiband  
10  
11 echo planar imaging at 3 T. *NeuroImage* 2013;83:991-1001.  
12
- 13 48. Tomson SN, Schreiner MJ, Narayan M, *et al.* Resting state functional MRI reveals  
14  
15 abnormal network connectivity in neurofibromatosis 1. *Hum Brain mapp*  
16  
17 2015;36:4566-81.  
18
- 19 49. Shilyansky C, Lee YS, Silva AJ. Molecular and cellular mechanisms of learning  
20  
21 disabilities: a focus on NF1. *Annu Rev Neurosci* 2010;33:221-43.  
22
- 23 50. Goncalves J, Violante IR, Sereno J, *et al.* Testing the excitation/inhibition imbalance  
24  
25 hypothesis in a mouse model of the autism spectrum disorder: in vivo  
26  
27 neurospectroscopy and molecular evidence for regional phenotypes. *Mol Autism*  
28  
29 2017;8:47.  
30
- 31 51. Molosh AI, Johnson PL, Spence JP, *et al.* Social learning and amygdala disruptions in  
32  
33 Nf1 mice are rescued by blocking p21-activated kinase. *Nat Neurosci* 2014;17:1583-  
34  
35 90.  
36
- 37 52. Mullins PG, McGonigle DJ, O'Gorman RL, *et al.* Current practice in the use of MEGA-  
38  
39 PRESS spectroscopy for the detection of GABA. *NeuroImage* 2014;86:43-52.  
40
- 41 53. Schurz M, Radua J, Aichhorn M, *et al.* Fractionating theory of mind: a meta-analysis of  
42  
43 functional brain imaging studies. *Neurosci Biobehav Rev* 2014;42:9-34.  
44
- 45 54. Bzdok D, Schilbach L, Vogeley K, *et al.* Parsing the neural correlates of moral cognition:  
46  
47 ALE meta-analysis on morality, theory of mind, and empathy. *Brain Struct Funct*  
48  
49 2012;217:783-96.  
50
- 51 55. Zamboni SL, Loenneker T, Boltshauser E, *et al.* Contribution of diffusion tensor MR  
52  
53 imaging in detecting cerebral microstructural changes in adults with  
54  
55 neurofibromatosis type 1. *Am J Neuroradiol* 2007;28:773-76.  
56  
57  
58  
59  
60

- 1  
2  
3 56. Shilyansky C, Karlsgodt KH, Cummings DM, *et al.* Neurofibromin regulates corticostriatal  
4 inhibitory networks during working memory performance. *P Natl Acad Sci USA*  
5 2010;107:13141-6.  
6  
7  
8  
9 57. van Engelen SJPM, Krab LC, Moll HA, *et al.* Quantitative differentiation between healthy  
10 and disordered brain matter in patients with neurofibromatosis type 1 using diffusion  
11 tensor imaging. *Am J Neuroradiol* 2008;29:816-22.  
12  
13  
14  
15 58. Faul F, Erdfelder E, Buchner A, *et al.* Statistical power analysis using G\*Power 3.1:  
16 Tests for correlation and regression analyses. *Behav Res Methods* 2009;41:1149-60.  
17  
18  
19 59. Wechsler D. Wechsler Preschool and Primary Scale of Intelligence, 4th Edition. San  
20 Antonio, Tx: Pearson 2012.  
21  
22  
23 60. Wechsler D. Wechsler Intelligence Scale for Children, 5th Edition. Pearson Assessment  
24 2016.  
25  
26  
27 61. Manly T, Robertson IH, Anderson V, *et al.* The Test of Everyday Attention for Children.  
28 London: Battley Brothers 1999.  
29  
30  
31 62. Espy KA. The shape school: assessing executive function in preschool children. *Dev*  
32 *Neuropsychol* 1997;13:495-9.  
33  
34  
35 63. Korkman M, Kirk U, Kemp S. The NEPSY 2nd Edition (NEPSY II) Scoring Manual.  
36 Bloomington, MN: Pearson 2007.  
37  
38  
39 64. Wechsler D. Wechsler Intelligence Scales for Children. 4th Edition. San Antonio: The  
40 Psychological Corporation 2003.  
41  
42  
43 65. Welsh MC, Pennington BF, Grossier DB. A normative developmental study of executive  
44 function: a window on prefrontal function in children. *Dev Neuropsychol* 1991;7:131-  
45 49.  
46  
47  
48 66. Wechsler D. Wechsler Individual Achievement Test 2nd Edition. New York:  
49 Psychological Corporation 2002.  
50  
51  
52 67. Benton AL, Sivan AB, Hamsher K, *et al.* Contributions for neuropsychological  
53 assessment 2nd Edition. Orlando, FL: Psychological Assessment Resources 1994.  
54  
55  
56  
57  
58  
59  
60

- 1  
2  
3 68. Baron-Cohen S, Wheelwright S, Scahill V, *et al.* Are intuitive physics and intuitive  
4 psychology independent? A test with children with Asperger Syndrome. *J Dev Learn*  
5 *Disord* 2001;5:47-78.  
6  
7  
8  
9 69. Baron-Cohen S, O'Riordan M, Jones R, *et al.* A new test of social sensitivity: Detection  
10 of faux pas in normal children and children with Asperger syndrome. *J Autism Devel*  
11 *Disord* 1999;29:407-18.  
12  
13  
14  
15 70. Happé FGE. An advanced test of theory of mind: understanding of story characters'  
16 thoughts and feelings by able autistic, mentally handicapped and normal children and  
17 adults. *J Autism Devel Disord* 1994;24:129-54.  
18  
19  
20  
21 71. Wiig EH, Secord W, Semel E. Clinical Evaluation of Language Fundamentals -  
22 Preschool, 2nd Edition (Australian). Marrickville: Harcourt Assessment 2006.  
23  
24 72. Semel E, Wiig EH, Secord WA. Clinical Evaluation of Language Fundamentals - Fourth  
25 Edition. Sydney: Harcourt Assessment 2003.  
26  
27  
28  
29 73. Constantino JN, Gruber CP. Social Responsiveness Scale, Second Edition. Los  
30 Angeles: Western Psychological Services 2012.  
31  
32  
33 74. Conners CK. Conners' Rating Scales-revised. New York: Multi-Health Systems Inc.  
34 1997.  
35  
36  
37  
38 75. Conners CK. Conners 3rd Edition. Toronto: Multi-Health Systems Inc 2009.  
39  
40 76. Gioia GA, Espy KA, Isquith PK. Behavior Rating Inventory of Executive Function,  
41 Preschool Version. Lutz, FL: Psychological Assessment Resources, Inc 2003.  
42  
43  
44 77. Gioia GA, Isquith PK, Guy SC, *et al.* Behavior Rating Inventory of Executive Function:  
45 Professional Manual. Odessa: PAR, Inc 2000.  
46  
47  
48 78. Harrison P, Oakland T. Adaptive Behavior Assessment System, Third Edition 2015.  
49  
50 79. Gresham FM, Elliott SN. Social skills improvement system rating scales. Minneapolis:  
51 NCS Pearson 2008.  
52  
53  
54 80. Dunn W. Sensory Profile-2: Pearson UK 2014.  
55  
56 81. Achenbach TM, Rescorla LA. Manual for the ASEBA Preschool Forms and Profiles.  
57 Burlington, VT: University of Vermont Department of Psychiatry 2000.  
58  
59  
60

- 1
- 2
- 3 82. Achenbach TM, Rescorla LA. Manual for the ASEBA School-Age Forms and Profiles.
- 4
- 5 Burlington, VT: University of Vermont, Research Center for Children, Youth, and
- 6
- 7 Families 2001.
- 8
- 9 83. Bishop DVM. Children's Communication Checklist-2. San Antonio, TX: Pearson 2006.
- 10
- 11
- 12
- 13
- 14
- 15
- 16
- 17
- 18
- 19
- 20
- 21
- 22
- 23
- 24
- 25
- 26
- 27
- 28
- 29
- 30
- 31
- 32
- 33
- 34
- 35
- 36
- 37
- 38
- 39
- 40
- 41
- 42
- 43
- 44
- 45
- 46
- 47
- 48
- 49
- 50
- 51
- 52
- 53
- 54
- 55
- 56
- 57
- 58
- 59
- 60

For peer review only

1  
2  
3 **Figure 1:** Diagram of study design for all groups.  
4  
5  
6  
7  
8  
9  
10  
11  
12  
13  
14  
15  
16  
17  
18  
19  
20  
21  
22  
23  
24  
25  
26  
27  
28  
29  
30  
31  
32  
33  
34  
35  
36  
37  
38  
39  
40  
41  
42  
43  
44  
45  
46  
47  
48  
49  
50  
51  
52  
53  
54  
55  
56  
57  
58  
59  
60

For peer review only



Table 1: Cognitive assessment measures

| Domain                             | Measure                                               | Description                                                                                                                                          | Cohort |
|------------------------------------|-------------------------------------------------------|------------------------------------------------------------------------------------------------------------------------------------------------------|--------|
| <i>Intelligence</i>                |                                                       |                                                                                                                                                      |        |
| General intelligence               | WPPSI IV <sup>59</sup>                                | 10 subtests providing 5 indices and full scale IQ                                                                                                    | Y      |
|                                    | WISC-V <sup>60</sup>                                  | 10 subtests providing 5 indices and full scale IQ                                                                                                    | S      |
| <i>Attention/executive</i>         |                                                       |                                                                                                                                                      |        |
| Attentional control                |                                                       |                                                                                                                                                      |        |
| Selective attention                | TEA-Ch Sky Search <sup>61</sup>                       | Assessing the ability to selectively attend to and identify 20 visual targets amongst distractors                                                    | S      |
| Sustained attention                | TEA-Ch Score! <sup>61</sup>                           | 10 trials assessing the ability to sustain attention by mentally counting aurally administered tones                                                 | S      |
| Response inhibition                | Shape School <sup>62</sup>                            | 4 conditions (each with 15 items) assessing inhibition, task-switching and working memory abilities in a shape and colour naming task                | Y      |
|                                    | NESPY-II Inhibition <sup>63</sup>                     | 6 items assessing the ability to inhibit automatic responses in favour of novel responses while quickly and efficiently naming shapes and directions | S      |
| Cognitive flexibility/goal setting |                                                       |                                                                                                                                                      |        |
| Working memory                     | From WPPSI IV <sup>59</sup>                           | 2 core subtests assessing visual working memory                                                                                                      | Y      |
|                                    | From WISC-V <sup>64</sup>                             | 2 core subtests assessing visual working memory and verbal working memory                                                                            | S      |
| Planning                           | Tower of Hanoi <sup>65</sup>                          | 6 items assessing set shifting, response inhibition, working memory and ability to hold a set of rules in mind in order to reach an end-state goal   | Y      |
| Attentional shifting               | TEA-Ch Creature Counting <sup>61</sup>                | 7 trials assessing the ability to accurately switch and redirect attention to count up/down                                                          | S      |
| <i>Academics</i>                   | WIAT-II Abbreviated <sup>66</sup>                     | 3 subtests assessing numerical operations, spelling, and single word reading                                                                         | S      |
| <i>Social cognition</i>            |                                                       |                                                                                                                                                      |        |
| Faces/emotion perception           |                                                       |                                                                                                                                                      |        |
| Emotion perception                 | NEPSY-II Affect Recognition <sup>63</sup>             | 36 items assessing the ability to match facial expressions from photographs of children's faces                                                      | Y, S   |
| Face perception                    | Benton Facial Recognition Test <sup>67</sup>          | 13 items assessing the ability to recognise a target face from a selection of distractors                                                            | S      |
| Mentalising/theory of mind         |                                                       |                                                                                                                                                      |        |
|                                    | NEPSY-II ToM <sup>63</sup>                            | 21 items assessing the ability to comprehend perspectives, intentions and beliefs of another person                                                  | Y, S   |
|                                    | Reading the Mind in the Eyes Test-Child <sup>68</sup> | 28 items assessing the ability to determine a person's thoughts or feelings based on a picture of only their eyes                                    | S      |
|                                    | Faux Pas Task <sup>69</sup>                           | 20 short stories assessing the ability to identify a social faux pas                                                                                 | S      |

|    |                      |                                                      |                                                                                                                                                                                     |   |
|----|----------------------|------------------------------------------------------|-------------------------------------------------------------------------------------------------------------------------------------------------------------------------------------|---|
| 1  |                      | Strange Stories <sup>70</sup>                        | 14 short stories assessing ability to attribute mental states (e.g., desires, beliefs or intentions) or perceive what a character knows, as well as 4 control comprehension stories | S |
| 2  |                      |                                                      |                                                                                                                                                                                     |   |
| 3  |                      |                                                      |                                                                                                                                                                                     |   |
| 4  | <i>Communication</i> |                                                      |                                                                                                                                                                                     |   |
| 5  | Expressive language  | CELF-Preschool-2 <sup>71</sup>                       | 2 subtests assessing knowledge of grammatical rules in a sentence completion task and the ability to name objects, people and activities                                            | Y |
| 6  |                      |                                                      |                                                                                                                                                                                     |   |
| 7  |                      | CELF-4 Formulated Sentences <sup>72</sup>            | 28 items assessing the ability to formulate semantically and grammatically correct spoken sentences using given words (e.g., car), based on an illustration                         | S |
| 8  | Receptive language   | CELF-Preschool-2 <sup>71</sup>                       | 22 items assessing the ability to interpret spoken sentences of increasing length and complexity                                                                                    | Y |
| 9  |                      |                                                      |                                                                                                                                                                                     |   |
| 10 |                      |                                                      |                                                                                                                                                                                     |   |
| 11 |                      | NEPSY-II Comprehension of Instructions <sup>88</sup> | 33 items assessing a child's ability to comprehend and follow multistep instructions of increasing complexity                                                                       | S |
| 12 |                      |                                                      |                                                                                                                                                                                     |   |

Note: Y = young cohort; S = School age cohort WPPSI IV = Wechsler Preschool and Primary Scale of Intelligence, 4<sup>th</sup> Edition; WISC-V = Wechsler Intelligence Scale for Children, 5<sup>th</sup> Edition; NEPSY = A Developmental Neuropsychological Assessment; TEA-Ch = Test of Everyday Attention for Children; WIAT-II = Wechsler Individual Achievement Test, 2<sup>nd</sup> Edition; ToM = Theory of Mind; CELF = Clinical Evaluation of Language Fundamentals.

Table 2: Behavioural and adaptive questionnaire measures

| Domain                                         | Measure                          | Description                                                                                                                                                                                                                                   | Cohort |
|------------------------------------------------|----------------------------------|-----------------------------------------------------------------------------------------------------------------------------------------------------------------------------------------------------------------------------------------------|--------|
| <i>ASD Symptomatology</i>                      | SRS-2 <sup>73</sup>              | 65 items assessing the presence and severity of ASD symptoms including social awareness, social cognition, social communication, social motivation, and restricted interests and repetitive behaviour                                         | Y, S   |
| <i>ADHD Symptomatology</i>                     | CADS <sup>74</sup>               | 26 items assessing ADHD symptoms of impulsivity/hyperactivity and inattention                                                                                                                                                                 | Y      |
|                                                | Conners 3 <sup>75</sup>          | 110 items assessing ADHD symptom and comorbid disorders including oppositional defiant and conduct problems, executive functions, learning problems, peer relations, and defiance/aggression                                                  | S      |
| <i>Executive Function</i>                      | BRIEF-Preschool <sup>76</sup>    | 63 items assessing executive functions within the home environment, including working memory, mental set shifting, response inhibition, emotional control, and planning/organisation                                                          | Y      |
|                                                | BRIEF <sup>77</sup>              | 86 items assessing executive functions in the home environment, including working memory, mental set shifting, response inhibition, emotional control, planning/organisation, organisation of materials, initiation, and behaviour monitoring | S      |
| <i>Adaptive Functioning</i>                    | ABAS-3: 0-5 years <sup>78</sup>  | 241 items assessing adaptive functioning skills, including communication, community use, pre-academics, home living, health and safety, leisure, self-care, self-direction, and social abilities                                              | Y      |
|                                                | ABAS-3: 5-21 years <sup>78</sup> | 232 items assessing adaptive functioning skills, including communication, community use, functional academics, home living, health and safety, leisure, self-care, self-direction, and social abilities                                       | S      |
| <i>Social Skills</i>                           | SSIS Rating Scale <sup>79</sup>  | 79 items assessing social skills, problem behaviours, and academic competence                                                                                                                                                                 | Y, S   |
| <i>Sensory Processing</i>                      | Sensory Profile 2 <sup>80</sup>  | 86 items assessing sensory processing, including auditory, visual, taste/smell, movement, body position, touch, plus behavioural skills including activity levels and emotional/social skills                                                 | Y, S   |
| <i>Behavioural, Emotional, Social Problems</i> | CBCL: 1.5 – 5years <sup>81</sup> | 100 items assessing internalising and externalising problems, emotional reactivity, anxiety/depression, somatic complaints, withdrawal, sleep problems, attention problems and aggressive behaviours                                          | Y      |
|                                                | CBCL: 6-18 years <sup>82</sup>   | 113 items assessing internalising and externalising problems, emotional reactivity, anxiety/depression, somatic complaints, withdrawal, sleep problems, attention problems and aggressive behaviours                                          | S      |

1  
2  
3  
4  
5  
6  
7  
8  
9  
10  
11  
12  
13  
14  
15  
16  
17  
18  
19  
20  
21  
22  
23  
24  
25  
26  
27  
28  
29  
30  
31  
32  
33  
34  
35  
36  
37  
38  
39  
40  
41  
42  
43  
44  
45  
46

*Pragmatic Language*

CCC-2<sup>83</sup>

70 items assessing speech, syntax, semantics, coherence, inappropriate initiation, stereotyped language, use of context, nonverbal communication, social relations, and interests

Y, S

---

Note: SRS-2 = Social Responsiveness Scale, 2<sup>nd</sup> Edition, CADS = Conners' Attention Deficit Hyperactivity Disorder Scales; BRIEF = Behavior Rating Inventory of Executive Functions; ABAS-3 = Adaptive Behaviour Assessment System, 3<sup>rd</sup> Edition; SSIS = Social Skills Improvement System; CBCL = Child Behavior Checklist; CCC-2 = Children's Communication Checklist, 2<sup>nd</sup> Edition.

For peer review only

Table 3: Brain MRI sequence parameters

| Sequence<br>Type                   | T1        |                        | T2        | DWI       |           |           |                 | fMRI      |                 | MRS*      |           |
|------------------------------------|-----------|------------------------|-----------|-----------|-----------|-----------|-----------------|-----------|-----------------|-----------|-----------|
|                                    | MPRAGE    | MEMPRAGE               | SPACE     | Shell 1   | Shell 2   | Shell 3   | Blip<br>up/down | rs-fMRI   | Blip<br>up/down | rTPJ      | PFC       |
| TR (ms)                            | 2100      | 2690                   | 3200      | 3300      | 3300      | 3300      | 3300            | 1500      | 3980            | 2000      | 2000      |
| TE (ms)                            | 2.22      | 2.14/3.8/<br>5.48/7.15 | 458       | 71.0      | 71.0      | 71.0      | 71.0            | 33.0      | 33.0            | 68.00     | 68.00     |
| TI (ms)                            | 1000      | 1650                   | 0         | -         | -         | -         | -               | -         | -               | -         | -         |
| Flip angle (degrees)               | 8         | 8                      | -         | 85        | 85        | 85        | 85              | 85        | 85              | -         | -         |
| Slices                             | 208       | 192                    | 208       | 64        | 64        | 64        | 64              | 60        | 60              | -         | -         |
| Voxel size (mm <sup>3</sup> )      | 0.80      | 0.90                   | 0.80      | 2.40      | 2.40      | 2.40      | 2.40            | 2.50      | 2.50            | 30        | 30        |
| FoV read (mm)                      | 256       | 254                    | 256       | 260       | 260       | 260       | 260             | 255       | 255             | -         | -         |
| FoV phase (%)                      | 93.8      | 100                    | 100       | 100       | 100       | 100       | 100             | 100       | 100             | -         | -         |
| Matrix                             | 320 x 320 | 288x288                | 320 x 320 | 110 x 110 | 110 x 110 | 110 x 110 | 110 x 110       | 104 x 104 | 104 x 104       | -         | -         |
| Band width (Hz/Px)                 | 220       | 790                    | 744       | 2392      | 2392      | 2392      | 2392            | 1718      | 1718            | 1850      | 1850      |
| Echo spacing (ms)                  | 6.30      | 9.20                   | 3.52      | 0.50      | 0.50      | 0.50      | 0.50            | 0.67      | 0.67            | -         | -         |
| Orientation                        | S         | S                      | S         | T         | T         | T         | T               | T         | T               | T         | T         |
| B value (s/mm <sup>2</sup> )       | -         | -                      | -         | 2800      | 2000      | 1000      | 0               | -         | -               | -         | -         |
| No. directions/b=0 s               | -         | -                      | -         | 63/6      | 45/5      | 25/5      | 6               | -         | -               | -         | -         |
| Multi-band factor                  | -         | -                      | -         | 2         | 2         | 2         | 2               | 3         | 3               | -         | -         |
| Parallel imaging -<br>GRAPPA       | 2         | 2                      | 2         | 2         | 2         | 2         | 2               | 2         | 2               | -         | -         |
| Acquisition time                   | 5 m 48 s  | 3 m 44 s               | 3 m 52 s  | 3 m 49 s  | 3 m 6 s   | 2 m       | 21 s (x 2)      | 6 m 57 s  | 28 s (x 2)      | 4 m 36 s  | 4 m 36 s  |
| Averages                           | -         | -                      | -         | -         | -         | -         | -               | -         | -               | 64x2      | 64x2      |
| Odd /even inversion<br>pulse (ppm) | -         | -                      | -         | -         | -         | -         | -               | -         | -               | 7.50/1.90 | 7.50/1.90 |

Note: rTPJ = right temporoparietal junction; PFC = prefrontal cortex; S = sagittal; T = transversal; TR = repetition time; TE = echo time; TI = inversion time; FoV = field of view; s = seconds; ms = milliseconds; mm<sup>3</sup> = millimetres cubed; mm = millimetres; mm<sup>2</sup> = millimetres squared ; Hz = hertz; GRAPPA = GeneRalized Autocalibrating Partial Parallel Acquisition; Px = pixels; ppm = parts per million. \*MCRI site only

1  
2  
3  
4  
5  
6  
7  
8  
9  
10  
11  
12  
13  
14  
15  
16  
17  
18  
19  
20  
21  
22  
23  
24  
25  
26  
27  
28  
29  
30  
31  
32  
33  
34  
35  
36  
37  
38  
39  
40  
41

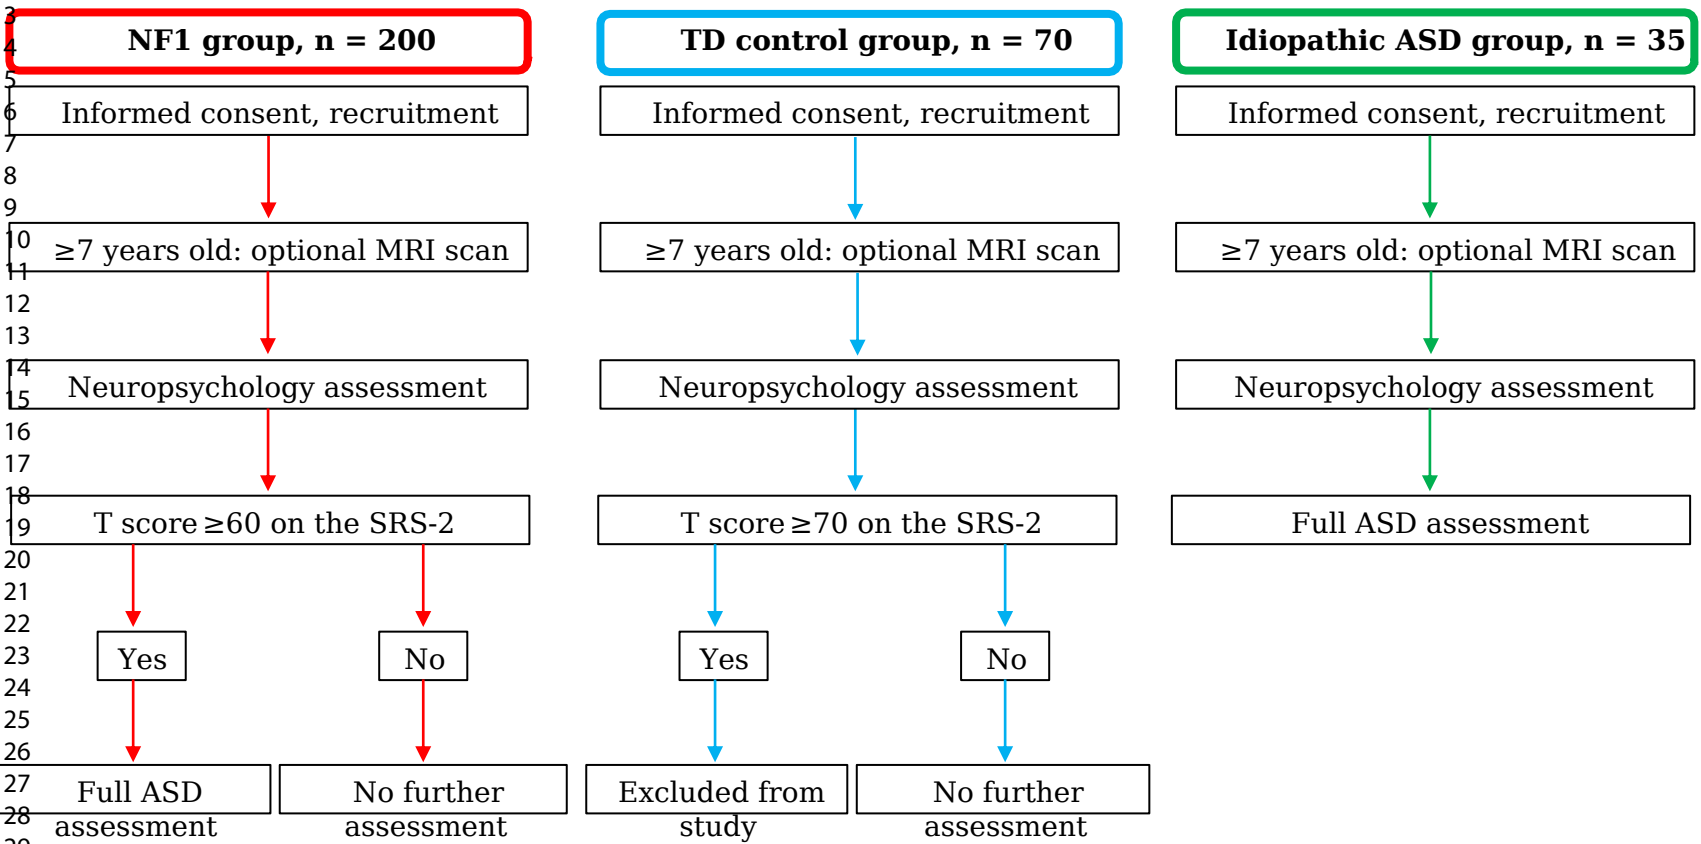

# BMJ Open

## Understanding autism spectrum disorder and social functioning in children with neurofibromatosis type 1: protocol for a cross-sectional multimodal study

|                                 |                                                                                                                                                                                                                                                                                                                                                                                                                                                                                                                                                                                                                                                                                                                                                                                                                                                                                                                                                                                                                                                                                                                                                                                                                                                                                                                                                                                                                                                                                                                                                                                                                                                                                                                                                       |
|---------------------------------|-------------------------------------------------------------------------------------------------------------------------------------------------------------------------------------------------------------------------------------------------------------------------------------------------------------------------------------------------------------------------------------------------------------------------------------------------------------------------------------------------------------------------------------------------------------------------------------------------------------------------------------------------------------------------------------------------------------------------------------------------------------------------------------------------------------------------------------------------------------------------------------------------------------------------------------------------------------------------------------------------------------------------------------------------------------------------------------------------------------------------------------------------------------------------------------------------------------------------------------------------------------------------------------------------------------------------------------------------------------------------------------------------------------------------------------------------------------------------------------------------------------------------------------------------------------------------------------------------------------------------------------------------------------------------------------------------------------------------------------------------------|
| Journal:                        | <i>BMJ Open</i>                                                                                                                                                                                                                                                                                                                                                                                                                                                                                                                                                                                                                                                                                                                                                                                                                                                                                                                                                                                                                                                                                                                                                                                                                                                                                                                                                                                                                                                                                                                                                                                                                                                                                                                                       |
| Manuscript ID                   | bmjopen-2019-030601.R1                                                                                                                                                                                                                                                                                                                                                                                                                                                                                                                                                                                                                                                                                                                                                                                                                                                                                                                                                                                                                                                                                                                                                                                                                                                                                                                                                                                                                                                                                                                                                                                                                                                                                                                                |
| Article Type:                   | Protocol                                                                                                                                                                                                                                                                                                                                                                                                                                                                                                                                                                                                                                                                                                                                                                                                                                                                                                                                                                                                                                                                                                                                                                                                                                                                                                                                                                                                                                                                                                                                                                                                                                                                                                                                              |
| Date Submitted by the Author:   | 02-Aug-2019                                                                                                                                                                                                                                                                                                                                                                                                                                                                                                                                                                                                                                                                                                                                                                                                                                                                                                                                                                                                                                                                                                                                                                                                                                                                                                                                                                                                                                                                                                                                                                                                                                                                                                                                           |
| Complete List of Authors:       | <p>Haebich, Kristina; Murdoch Childrens Research Institute, Child Neuropsychology<br/> Pride, Natalie; The Children's Hospital at Westmead, Institute for Neuroscience and Muscle Research; University of Sydney, Discipline of Paediatrics and Child Health, Faculty of Medicine<br/> Walsh, Karin; Children's National Health System<br/> Chisholm, Anita; Murdoch Childrens Research Institute, Child Neuropsychology<br/> Rouel, Melissa; The Children's Hospital at Westmead, Institute for Neuroscience and Muscle Research<br/> Maier, Alice; Murdoch Childrens Research Institute, Child Neuropsychology<br/> Anderson, Vicki; Murdoch Childrens Research Institute, Child Neuropsychology<br/> Barton, Belinda; The Children's Hospital at Westmead, Children's Hospital Education Research Institute; University of Sydney, Discipline of Paediatrics and Child Health, Faculty of Medicine<br/> Silk, Tim; Deakin University<br/> Korgaonkar, Mayuresh; University of Sydney, Brain Dynamics Centre, Westmead Institute for Medical Research<br/> Seal, Marc; Murdoch Childrens Research Institute, Clinical Sciences<br/> Lami, Francesca; Murdoch Childrens Research Institute, Child Neuropsychology<br/> Lorenzo, Jennifer; The Children's Hospital at Westmead, Institute for Neuroscience and Muscle Research<br/> Williams, Katrina; Monash University, Department of Paediatrics<br/> Dabscheck, Gabriel; Royal Children's Hospital Melbourne, Department of Neurology<br/> Rae, Caroline; Neuroscience Research Australia<br/> Kean, Michael; Royal Children's Hospital Melbourne<br/> North, Kathryn; Murdoch Childrens Research Institute<br/> Payne, Jonathan; Murdoch Childrens Research Institute, Child Neuropsychology</p> |
| <b>Primary Subject Heading</b>: | Paediatrics                                                                                                                                                                                                                                                                                                                                                                                                                                                                                                                                                                                                                                                                                                                                                                                                                                                                                                                                                                                                                                                                                                                                                                                                                                                                                                                                                                                                                                                                                                                                                                                                                                                                                                                                           |
| Secondary Subject Heading:      | Neurology, Mental health                                                                                                                                                                                                                                                                                                                                                                                                                                                                                                                                                                                                                                                                                                                                                                                                                                                                                                                                                                                                                                                                                                                                                                                                                                                                                                                                                                                                                                                                                                                                                                                                                                                                                                                              |
| Keywords:                       | Neurofibromatosis type 1, Magnetic resonance imaging < RADIOLOGY &                                                                                                                                                                                                                                                                                                                                                                                                                                                                                                                                                                                                                                                                                                                                                                                                                                                                                                                                                                                                                                                                                                                                                                                                                                                                                                                                                                                                                                                                                                                                                                                                                                                                                    |

1  
2  
3  
4  
5  
6  
7  
8  
9  
10  
11  
12  
13  
14  
15  
16  
17  
18  
19  
20  
21  
22  
23  
24  
25  
26  
27  
28  
29  
30  
31  
32  
33  
34  
35  
36  
37  
38  
39  
40  
41  
42  
43  
44  
45  
46  
47  
48  
49  
50  
51  
52  
53  
54  
55  
56  
57  
58  
59  
60

|  |                                                                         |
|--|-------------------------------------------------------------------------|
|  | IMAGING, Autism spectrum disorder, Social cognition, Social functioning |
|  |                                                                         |

SCHOLARONE™  
Manuscripts



1  
2  
3 **Understanding autism spectrum disorder and social functioning in children with**  
4 **neurofibromatosis type 1: protocol for a cross-sectional multimodal study**  
5  
6  
7  
8

9 Kristina M Haebich,<sup>1</sup> Natalie A Pride,<sup>2,3</sup> Karin S Walsh,<sup>4</sup> Anita Chisholm,<sup>1,5</sup> Melissa Rouel,<sup>2</sup>  
10 Alice Maier,<sup>1</sup> Vicki Anderson,<sup>1,5</sup> Belinda Barton,<sup>2,3,6</sup> Tim Silk,<sup>1,7</sup> Mayuresh S Korgaonkar,<sup>8</sup>  
11 Marc L Seal,<sup>1,5</sup> Francesca Lami,<sup>1</sup> Jennifer Lorenzo,<sup>2</sup> Katrina Williams,<sup>9</sup> Gabriel Dabscheck,<sup>10</sup>  
12 Caroline D Rae,<sup>11,12</sup> Michael Kean,<sup>1</sup> Kathryn N North,<sup>1,5</sup> Jonathan M Payne<sup>1,5</sup>  
13  
14  
15  
16  
17  
18  
19  
20

21 <sup>1</sup> Murdoch Children's Research Institute, The Royal Children's Hospital, Parkville, VIC,  
22 Australia  
23  
24

25 <sup>2</sup> Kids Neuroscience Centre, The Children's Hospital at Westmead, NSW, Australia  
26  
27

28 <sup>3</sup> Discipline of Child and Adolescent Health, The University of Sydney Medical School, NSW,  
29 Australia  
30  
31

32 <sup>4</sup> Children's National Health System, Washington, DC, United States  
33  
34

35 <sup>5</sup> Department of Paediatrics, Faculty of Medicine, Dentistry and Health Science, University of  
36 Melbourne, Melbourne, VIC, Australia  
37  
38

39 <sup>6</sup> Children's Hospital Education Research Institute, The Children's Hospital at Westmead,  
40 NSW, Australia  
41  
42

43 <sup>7</sup> School of Psychology, Deakin University, VIC, Australia  
44  
45

46 <sup>8</sup> Brain Dynamics Centre, Westmead Institute for Medical Research, The University of  
47 Sydney Medical School, NSW, Australia  
48  
49

50 <sup>9</sup> Department of Paediatrics, Monash University, Clayton, VIC, Australia  
51  
52

53 <sup>10</sup> Department of Neurology, The Royal Children's Hospital, Parkville, VIC, Australia  
54  
55

56 <sup>11</sup> Neuroscience Research Australia, Randwick, NSW, Australia  
57  
58  
59  
60

1  
2  
3 <sup>12</sup> School of Medical Sciences, The University of New South Wales, Kensington, NSW,  
4  
5 Australia

6  
7  
8  
9  
10  
11 *Corresponding author:* Dr Jonathan Payne. Murdoch Children's Research Institute, The  
12  
13 Royal Children's Hospital, Flemington Road, Parkville VIC 3052, Australia.

14  
15  
16 Ph: +61 3 9936 6761

17  
18 Email: [jonathan.payne@mcri.edu.au](mailto:jonathan.payne@mcri.edu.au)  
19  
20  
21  
22  
23  
24  
25  
26  
27  
28  
29  
30  
31  
32  
33  
34  
35  
36  
37  
38  
39  
40  
41  
42  
43  
44  
45  
46  
47  
48  
49  
50  
51  
52  
53  
54  
55  
56  
57  
58  
59  
60

## ABSTRACT

**Introduction:** Children with the single-gene disorder neurofibromatosis type 1 (NF1) appear to be at an increased risk for autism spectrum disorder (ASD) and exhibit a unique social-cognitive phenotype compared to children with idiopathic ASD. A complete framework is required to better understand autism in NF1, from neurobiological levels through to behavioural and functional outcomes. The primary aims of this study are to establish the frequency of ASD in children with NF1, examine the social cognitive phenotype, investigate the neuropsychological processes contributing to ASD symptoms and poor social functioning in children with NF1, and to investigate novel structural and functional neurobiological markers of ASD and social dysfunction in NF1. The secondary aim of this study is to compare the neuropsychological and neurobiological features of ASD in children with NF1 to a matched group of patients with idiopathic ASD.

**Methods and analysis:** This is an international, multisite, prospective, cross-sectional cohort study of children with NF1, idiopathic ASD, and typically developing (TD) controls. Participants will be 200 children with NF1 (3-15 years of age), 70 TD participants (3-15 years), and 35 children with idiopathic ASD (7-15 years). Idiopathic ASD and NF1 cases will be matched on age, sex and intelligence. All participants will complete cognitive testing and parents will rate their child's behaviour on standardised questionnaires. Neuroimaging will be completed by a subset of participants aged seven years and older. Children with NF1 that screen at risk for ASD on the parent-rated Social Responsiveness Scale will be invited back to complete the Autism Diagnostic Observation Scale 2<sup>nd</sup> Edition and Autism Diagnostic Interview-Revised to determine whether they fulfil ASD diagnostic criteria.

**Ethics and dissemination:** This study has hospital ethics approval and the results will be disseminated through peer-reviewed publications and international conferences.

### Strengths and limitations of this study

- Gold standard assessment of autism spectrum disorder (ASD) using the clinician rated Autism Diagnostic Interview-Revised and the Autism Diagnostic Observation Scale 2<sup>nd</sup> Edition to determine the frequency of ASD in children with NF1.
- An explanatory framework for understanding ASD in NF1, incorporating markers of brain development and neurocognitive performance with behavioural symptoms and functional outcomes.
- This study will help guide the development and implementation of developmentally appropriate and effective interventions for children with NF1 and ASD or those with impairing social deficits.
- The relatively small number of idiopathic ASD participants (n = 35) may not capture the full extent of clinical heterogeneity in the condition limiting the ability to compare and contrast the ASD phenotype in NF1 to the idiopathic disorder.

## INTRODUCTION

Autism spectrum disorder (ASD) is a neurodevelopmental disorder characterised by impairments in social communication, restricted interests and repetitive behaviours that result in pervasive social challenges and reduced quality of life. In the general population, ASD is a heterogeneous disorder resulting from complex gene-environment interactions.<sup>1</sup> Genetic influences are a particularly strong component of ASD aetiology, evidenced by heritability estimates of 83-90% in recent meta-analyses of twin studies, and greater ASD concordance in the context of increased genetic relatedness.<sup>2,3</sup> Despite clear genetic underpinnings, there is striking genetic heterogeneity with over 1,000 candidate genes reported to be related to ASD.<sup>4,5</sup> Such aetiological complexity has proven a significant challenge in understanding the molecular and neurobiological mechanisms underlying this disorder.

In a subset of children, ASD co-occurs with a clinically defined syndrome, many of which arise from a known single gene mutation.<sup>6,7</sup> The significant reductions in genetic heterogeneity in these “syndromic” forms of ASD enables the molecular and neurobiological pathways critical to ASD to be better understood, making it possible to identify distinct neurodevelopmental subtypes of ASD within these monogenetic syndromes. One such syndrome is neurofibromatosis type 1 (NF1), an autosomal dominant disorder caused by loss-of-function mutations within the *NF1* gene. With a birth incidence of 1 in 2,700, NF1 is one of the most common monogenic disorders to affect the central nervous system.<sup>8</sup> Although general intellectual functioning typically fall within the lower limit of the normal range (e.g., low 90s), specific cognitive deficits are the greatest cause of morbidity in children with NF1, with up to 80% experiencing deficits in at least one cognitive domain.<sup>9</sup> Attention, executive function, visuoperception and language are most often affected.<sup>9,10</sup> There is also increasing evidence to indicate social cognitive deficits are another core feature of the NF1 phenotype.<sup>11</sup> Deficits in face and emotion recognition have been reported in school-aged children with NF1, including difficulties detecting negative emotions (e.g.,

1  
2  
3 anger) and discerning emotions from more ambiguous representations.<sup>12-14</sup> Higher-level  
4 social cognitive deficits are also reported, including difficulties attributing mental  
5 representations and intent to others (e.g., theory of mind).<sup>15</sup>  
6  
7  
8  
9

10  
11 Children with NF1 are at an increased risk for ASD. At the group level, recent meta-analysis  
12 has demonstrated large effects sizes for ASD symptomatology across eight studies of  
13 individuals with NF1 (Hedges'  $g=0.9$ ).<sup>11</sup> Results from a large international pooled dataset of  
14 531 individuals with NF1 indicated that 39% of patients demonstrate at least sub-threshold  
15 ASD symptoms on the Social Responsiveness Scale 2<sup>nd</sup> edition (SRS-2), with 13% scoring  
16 in the most severe range.<sup>16</sup> To date, only a handful of studies have employed clinic-based  
17 assessments to establish the prevalence of ASD in NF1,<sup>17-19</sup> returning estimates of 11-25%  
18 in school-aged children; significantly higher than rates observed in the general population  
19 (approximately 1%).<sup>20</sup>  
20  
21  
22  
23  
24  
25  
26  
27  
28  
29  
30

31  
32 There are a number of phenotypic similarities between children with NF1 and idiopathic  
33 ASD. Both experience social interaction difficulties,<sup>21</sup> hyperactivity,<sup>22</sup> and anxiety.<sup>23</sup> In line  
34 with current conceptual frameworks,<sup>24</sup> both groups also demonstrate executive deficits (e.g.,  
35 cognitive inflexibility, planning) and reduced social cognitive abilities, which may contribute to  
36 the ASD symptoms and social difficulties.<sup>14 15 25</sup> However, between group differences are  
37 also observed.<sup>16 26</sup> For example, children with NF1 appear to demonstrate fewer repetitive  
38 behaviours and better language skills than children with idiopathic ASD.<sup>17</sup> Further, idiopathic  
39 ASD is often associated with intellectual impairment, whereas children with NF1-related ASD  
40 typically demonstrate intelligence estimates within the average range.<sup>10 19</sup> The strong  
41 male:female bias in idiopathic ASD (4:1)<sup>27</sup> also appears to be attenuated in NF1, with  
42 estimates at approximately 1.6-2.6:1.<sup>16 28</sup> On average, the age children with NF1 receive a  
43 diagnosis of ASD is 10.65 years,<sup>17</sup> which is significantly later than the idiopathic condition,  
44 which is around 4 years.<sup>29</sup> While these data suggest that autism symptoms are typically not  
45 identified by parents or health professionals of children with NF1 until 8-10 years of age,<sup>16 30</sup>  
46  
47  
48  
49  
50  
51  
52  
53  
54  
55  
56  
57  
58  
59  
60

1  
2  
3 the possible “masking role” of neurodevelopmental comorbidities such as attention  
4 deficit/hyperactivity disorder (ADHD) and the complex medical issues experienced by  
5 children with NF1 is unclear.  
6  
7  
8  
9

10  
11 Despite the recent advances into understanding ASD in NF1 over the last few years, many  
12 critical questions remain. Indeed a complete explanatory framework for understanding ASD  
13 in a single-gene model such as NF1 requires multiple levels of analysis in order to delineate  
14 the effect of *NF1* mutation on gene expression, cell signalling, brain structure and function,  
15 and neurocognitive performance as well as behavioural symptoms and functional  
16 outcomes.<sup>31</sup> In NF1, loss of the gene product neurofibromin causes disinhibition of the RAS-  
17 MAPK signalling cascade, resulting in abnormal brain development.<sup>32 33</sup> Aberrant cellular  
18 signalling further triggers abnormal GABAergic neurotransmission, impaired long-term  
19 potentiation, and a loss of synaptic plasticity.<sup>34 35</sup> Presently, the neurobiological mechanisms  
20 underlying NF1-related ASD symptoms and functional impairments remain unclear. This  
21 study will explore the neurobiological, cognitive, behavioural and functional phenotype in  
22 children with NF1 and how each of these levels of analysis contribute to the ASD phenotype.  
23 Further, the majority of research to date has estimated NF1-related ASD symptoms based  
24 on parent-reported measures. To provide obtain a deeper understanding of the ASD  
25 phenotype in NF1, we will use the current gold-standard combination of the clinician-rated  
26 Autism Diagnostic Interview-Revised (ADI-R) with the Autism Diagnostic Observation Scale  
27 2<sup>nd</sup> Edition (ADOS-2). These data will enable us to provide greater certainty in the ASD  
28 prevalence rate in NF1, and to identify potentially important similarities and differences  
29 between the symptom profiles of NF1-related ASD and idiopathic ASD.  
30  
31  
32  
33  
34  
35  
36  
37  
38  
39  
40  
41  
42  
43  
44  
45  
46  
47  
48  
49  
50

51  
52  
53 The primary aims of this study are to (1) comprehensively phenotype ASD-like behaviours  
54 and establish the frequency of ASD in children with NF1, (2) examine the social cognitive  
55 phenotype of children with NF1, (3) identify the neuropsychological processes contributing to  
56 ASD symptoms and poor social functioning in children with NF1, and (4) investigate novel  
57  
58  
59  
60

1  
2  
3 structural and functional neurobiological markers of ASD and social dysfunction in children  
4 with NF1. The secondary aim of this study is to compare cognitive and symptom profiles as  
5 well as neurobiological markers of ASD in children with NF1 to a matched group of patients  
6 with idiopathic ASD.  
7  
8  
9  
10

## 11 12 13 **METHODS AND ANALYSIS**

### 14 **Study design**

15  
16 This is an international, multisite, prospective, cross-sectional cohort study of children with  
17 NF1, idiopathic ASD, and typically developing (TD) controls. Participants will complete  
18 detailed assessment of their cognitive abilities, behaviour and adaptive functioning. As part  
19 of this assessment, participants will be screened for ASD symptoms. All idiopathic ASD  
20 participants, as well as NF1 participants that screen *at risk* for ASD (defined below), will  
21 complete a comprehensive assessment which will be used to guide the formulation of  
22 research and clinical ASD diagnoses (see ASD assessment measures below for further  
23 details). Children aged  $\geq 7$  years will also be invited to undergo multimodal magnetic  
24 resonance imaging (MRI; Australian sites only). An overview of the study design for each  
25 group is provided in Figure 1.  
26  
27  
28  
29  
30  
31  
32  
33  
34  
35  
36  
37  
38  
39  
40

---

41 *Insert Figure 1 here*

---

### 42 43 44 **Participants and recruitment**

45  
46 Three groups will be recruited; children with NF1 (n=200; 3-15 years of age), children with  
47 idiopathic ASD (n=35; 7-15 years of age), and TD controls from the general population  
48 (n=80; 3-15 years of age). Prospective participants with NF1 will be recruited from three  
49 international genetic centres; (1) the Neurofibromatosis Clinic at the Royal Children's  
50 Hospital/Murdoch Children's Research Institute (MCRI), Melbourne, Australia; (2) the  
51 Neurogenetics Clinic at The Children's Hospital at Westmead (CHW), Sydney, Australia; and  
52  
53  
54  
55  
56  
57  
58  
59  
60



1  
2  
3 (3) the Gilbert Neurofibromatosis Institute at the Children's National Health System,  
4 Washington DC, USA. Children are referred to these clinics by general practitioners and  
5 medical specialists for evaluation, diagnosis, and management of NF1. All three clinics are  
6 specialist centres for the multidisciplinary care of individuals with NF1, are well resourced for  
7 the collection of cognitive and behavioural research data, and service clinical populations  
8 thought to be representative of the wider NF1 community. NF1 participants will be diagnosed  
9 with NF1 by an expert neurologist or clinical geneticist based on criteria specified by the  
10 National Institutes of Health Conference Statement.<sup>36</sup> The study coordinator at each site will  
11 recruit NF1 participants. The coordinator will approach families attending the clinic and  
12 inquire about interest in the study. To minimise selection bias, the study coordinator will  
13 sequentially approach families with a child in the defined age range.  
14  
15  
16  
17  
18  
19  
20  
21  
22  
23  
24  
25  
26  
27

28 Participants with idiopathic ASD will be recruited at the MCRI site from local clinical services  
29 and from families known to existing studies who have previously indicated a willingness to  
30 be contacted for future research. All idiopathic ASD participants will have received an ASD  
31 diagnosis by a clinician prior to enrolment and have no known genetic disorders associated  
32 with ASD. They will be matched to NF1 participants with a comorbid diagnosis of ASD on  
33 age, sex and intelligence. Given that approximately 94% of children with NF1 present with  
34 an IQ >70,<sup>37</sup> the majority of recruited children with idiopathic ASD will not have evidence of  
35 an intellectual disability based on records of intellectual function to provide a suitable match.  
36  
37  
38  
39  
40  
41  
42  
43  
44  
45  
46  
47

48 Control participants will be recruited via several methods. First, we will invite individuals that  
49 have participated as TD controls in previous research studies and provided consent to be re-  
50 contacted for future studies. Contact will initially take the form of a mail out of the Parent  
51 Information and Consent Form and a cover letter inviting them to contact the site study  
52 coordinator if they would like to participate. A follow-up phone call will be made two weeks  
53 later to ascertain interest in participating. Second, approved advertisements will be placed  
54  
55  
56  
57  
58  
59  
60

1  
2  
3 on hospital noticeboards inviting interested participants to contact the site investigator for  
4  
5 more information about the study.  
6  
7  
8

9 Exclusion criteria for all participants are:

- 11 • Participant and at least one parent/guardian not fluent in English.
- 12
- 13 • Significant sensory impairment that limits the validity of psychometric testing.
- 14
- 15
- 16 • Symptomatic intracranial pathology that may impact cognitive and  
17 behavioural function, such as an acquired brain injury, hydrocephalus, or  
18 progressive intracranial tumours (children with asymptomatic lesions such as  
19 optic gliomas will be eligible).  
20  
21  
22  
23  
24  
25

26 Additional exclusion criteria that applies to TD control participants only:

- 27
- 28 • Positive history of a neurological, genetic, or psychological disorder.
- 29
- 30 • Developmental delay/intellectual disability.  
31  
32  
33  
34

35 The first participant was recruited to this study in June 2016 and we anticipate the end date  
36 for enrolment to be December 2020.  
37  
38  
39  
40

## 41 Procedure

42  
43 Once informed consent has been obtained, parents/caregivers will complete a semi-  
44 structured interview with a member of the study team which will determine eligibility, confirm  
45 demographic details (date of birth, language spoken at home, school grade), obtain  
46 socioeconomic information (primary caregiver's highest level of education, occupation, and  
47 employment status), and a detailed developmental/medical history will also be taken. Eligible  
48 children will then undergo cognitive assessment individually with a site psychologist in a  
49 quiet room. Study personnel will follow a test administration protocol to minimise between-  
50  
51  
52  
53  
54  
55  
56  
57  
58  
59  
60

1  
2  
3 site variation. Children exhibiting fatigue during the assessment will complete the testing  
4  
5 over multiple days.  
6  
7  
8

9  
10 Parents/caregivers will complete detailed questionnaires covering a range of behavioural  
11 and functional outcomes, including the SRS-2. NF1 participants that screen at risk for ASD  
12 on the basis of their SRS-2 results (total symptom T-score  $\geq 60$ ) will be invited to complete  
13 the diagnostic ASD assessment. Idiopathic ASD participants will also complete the ASD  
14 assessment so that a comprehensive understanding of their behavioural profile can be  
15 obtained. These will be audiotaped and videotaped respectively, so that independent blinded  
16 double interrater coding can be completed in 25% of the sample.  
17  
18  
19  
20  
21  
22  
23  
24  
25

26 Children aged  $\geq 7$  years that are able to complete a brain MRI safely will be offered the  
27 option to undergo neuroimaging. Neuroimaging will only take place at Australian sites.  
28  
29  
30  
31

## 32 **Measures**

### 33 *Cognitive and behavioural measures*

34  
35  
36  
37 *Insert Table 1 here*  
38  
39  
40

41 Cognitive domains selected for assessment are based on a biopsychosocial model for social  
42 functioning that integrates abilities thought to underlie the development and expression of  
43 social behaviour, including attention/executive function, communication, and social cognitive  
44 skills.<sup>24</sup> To ensure appropriate age-normed tests are administered, participants will be  
45 grouped into a younger cohort of children aged 3-5 years, and a school-aged cohort of  
46 children aged 6-15 years. Child-direct assessment measures for each cohort are presented  
47 in Table 1. Parent reported measures are outlined in Table 2.  
48  
49  
50  
51  
52  
53  
54  
55  
56  
57

58 *Insert Table 2 here*  
59  
60

### *ASD assessment measures*

The ADI-R<sup>63</sup> is a semi-structured, standardised diagnostic interview designed to assess core aspects of ASD. The ADI-R is administered to a parent/caregiver by a trained clinician and consists of 95 items covering current and past behaviour, across the areas of family background, developmental history, language, communication, social development, interests and general behaviour. Items are coded according to the examiner's judgement of the presence/absence or the extent of a given behaviour using a scale ranging from 0 (behaviour not present) to 3 (definite abnormality, marked in severity). An algorithm is used to code summary scores for the three domains required for diagnosis: social interaction, communication and restricted and repetitive behaviours. Diagnostic criteria for ASD are met when all three domain scores exceed the following cut-offs: social interaction domain  $\geq 10$ ; communication  $\geq 8$ ; and restricted interests and repetitive behaviours  $\geq 3$ . The ADI-R is effective in differentiating groups of children with and without ASD, and discriminating autism symptomology.<sup>64</sup>

The ADOS-2<sup>65</sup> is a semi-structured, standardised child-direct observational assessment designed to assess reciprocal social interaction and communication, play, and use of imagination. It consists of four modules, of which one will be administered depending on the participant's developmental age and expressive language ability: (1) preverbal/have single word language; (2) phrase speech abilities; (3) verbally fluent children/adolescents; and (4) verbally fluent adolescents/adults. Each module takes approximately 30 minutes to complete by a trained examiner. For each module, individual items are scored on a three point scale ranging from 0 (no evident abnormality) to 3 (marked abnormality). Module observations are scored according to the ADOS-2 diagnostic algorithm under two domains; social affect and restricted and repetitive behaviours. A combined domain total of  $\geq 7$  is classified as meeting diagnostic criteria for ASD, consistent with DSM-5.<sup>65</sup>

1  
2  
3 If the results of the ADI-R and ADOS-2 are not in agreement regarding ASD classification,  
4 we will employ the research criteria proposed by Risi and colleagues to resolve ADI-R and  
5 ADOS-2 discordance.<sup>66</sup> Use of these criteria relax the original ADI-R criteria that were  
6 developed to detect the formerly defined Autistic Disorder,<sup>64</sup> to encompass the broader  
7 category of ASD outlined in the DSM-V. A research diagnosis of ASD is thus assigned to a  
8 participant if he/she meets criteria on the ADOS-2 (either autism or autism spectrum) and  
9 meets one of the following criteria on the ADI-R:  
10  
11  
12  
13  
14  
15  
16

- 17 1. Meets ASD cut-off for the social reciprocity domain and either communication or  
18 restricted interests and repetitive behaviours domains;  
19
- 20 2. Comes within one point for both social reciprocity and communication domains;  
21
- 22 3. Meets ASD cut-off on one domain (either social reciprocity or communication) and  
23 comes within two points of the cut-off on the other domain (either social reciprocity or  
24 communication).  
25  
26  
27  
28  
29  
30  
31

32 In addition to a research classification, a multi-disciplinary team will establish a clinical  
33 consensus diagnosis for all participants with NF1 who have completed the ASD assessment.  
34 This consensus diagnosis will be made according to DSM-V guidelines, using all available  
35 diagnostic information.  
36  
37  
38  
39  
40  
41  
42

### 43 **Neuroimaging procedure**

#### 44 *Mock training*

45 At the MCRl site, children will complete a 30 minute training session in a mock MRI scanner  
46 which reproduces the physical environment of the real scanner including noise effects. This  
47 familiarises participants to the MRI environment, lowers anxiety and provides practice at  
48 keeping still during the scanning session.<sup>67</sup> Children who find the training sessions  
49 distressing and wish to withdraw from the neuroimaging component may do so at any time  
50 without affecting their ability to participate in the cognitive and behavioural assessment.  
51  
52  
53  
54  
55  
56  
57  
58  
59  
60

### *MRI scan*

Neuroimaging data will be obtained on a 3-Tesla Siemens MAGNETOM Prisma MRI scanner with a 64-channel head coil at both MCRI and CHW sites. The magnetic resonance spectroscopy sequences, which will only be conducted at MCRI, will use a 32-channel head coil. The neuroimaging protocol comprises structural and functional sequences which will be completed in two 45 minute sessions with a 30 minute break in between (MCRI site) or in one 45 minute session (CHW site). See Table 3 for sequence details.

### *Structural neuroimaging*

Three dimensional high-resolution structural T1-weighted magnetization prepared rapid gradient-echo (MPRAGE) images will be acquired to provide whole brain and regional grey and white matter (WM) volume, cortical thickness and other morphological features, as outlined in Table 3. Children exhibiting high levels of movement during the MPRAGE sequence, will complete a second T1-weighted multi-echo magnetization prepared rapid gradient-echo (MEMPRAGE) sequence, which uses navigator based prospective motion correction to reduce artefact and improve structural image contrast, providing more accurate tissue segmentation.<sup>67-69</sup>

A T2-SPACE (Sampling Perfection with Application optimized Contrast with flip angle Evolution) protocol will be acquired to obtain T2-weighted anatomical images and provide information about the number and location of focal areas of WM hyperintensity that are common in NF1 (Table 3).<sup>33 70-72</sup> The relationship between focal areas of high intensity and cognitive and behavioural deficits remains unclear.<sup>33 73</sup>

---

*Insert Table 3 here*

---

### *Multi-band, multi-shell diffusion neuroimaging*

1  
2  
3 A multi-band accelerated EPI sequences protocol, developed by the Centre for Magnetic  
4 Resonance Research (CMRR, University of Minnesota), will be acquired in order to obtain  
5 diffusion-weighted images (DWI) and examine brain microstructure through the identification  
6 of WM fibre tracts and their directionality. DWI measures the direction and extent of water  
7 diffusion through brain tissue, which is dependent on the underlying tissue structure,  
8 permitting examination of differences in cellular structure.<sup>74 75</sup> Diffusion parameters indicate  
9 changes in axonal properties.<sup>74 75</sup> The multi-band accelerated EPI protocol uses multiple  
10 shell acquisition to accelerate DWI volume coverage, and involves anterior-posterior phase  
11 encoding direction as well as standard and reverse phase encoded blipped image  
12 acquisition to correct for magnetic susceptibility-induced distortions related to the EPI  
13 acquisitions.<sup>67 76 77</sup> Three diffusion weighted shells will be acquired (Table 3) to perform  
14 tractography and estimate WM microstructure, including traditional tensor metrics (fractional  
15 anisotropy, and mean, radial and axial diffusivity), as well as more advanced techniques that  
16 provide greater specificity to the microstructural properties, such as fibre density.  
17  
18  
19  
20  
21  
22  
23  
24  
25  
26  
27  
28  
29  
30  
31  
32  
33  
34

### 35 *Multi-band resting state functional neuroimaging*

36 Resting state functional MRI (rs-fMRI) will be used to measure intrinsic functional  
37 connectivity between brain regions while subjects are at rest. During the sequence,  
38 participants are instructed to look at a white fixation cross on a black screen (Table 3).  
39 Resting state connectivity is useful for studying abnormal neural network connectivity in NF1,  
40 and its relationship with cognitive and behavioral deficits.<sup>78</sup>  
41  
42  
43  
44  
45  
46  
47  
48  
49

### 50 *Magnetic resonance spectroscopy*

51 Magnetic resonance spectroscopy (MRS) is an *in vivo* tool capable of non-invasively  
52 measuring brain metabolites. The MCRI site only will acquire two GABA-edited magnetic  
53 resonance spectra using the localised spectroscopy sequence MEGA-PRESS, developed by  
54 CMRR, to evaluate the animal model-derived hypothesis that alterations in GABA and  
55 glutamate systems underlie cognitive and social impairments in NF1.<sup>79-81</sup> MEGA-PRESS  
56  
57  
58  
59  
60

1  
2  
3 allows separation of GABA signals from stronger overlying signals of other metabolites.<sup>82</sup>  
4  
5 Voxels will be positioned in regions with consistency of field homogeneity within the  
6  
7 prefrontal cortex (PFC) and the right temporoparietal junction (rTPJ), both of which are  
8  
9 integral regions within the social brain network.<sup>83 84</sup> The PFC voxel will be placed across the  
10  
11 midline of the pre-central sulcus, crossing across both hemispheres, in the medial prefrontal  
12  
13 cortex. The rTPJ voxel will be placed towards the rear border of the temporal and parietal  
14  
15 lobes, in the posterior cerebral cortex. T1-weighted images will be used to guide MRS voxel  
16  
17 placement.  
18  
19  
20  
21

## 22 **Data analysis**

23  
24 Descriptive statistics will be used to establish the frequency of ASD in children with NF1.  
25  
26 Between-group differences on general and social cognitive measures will be examined using  
27  
28 analysis of variance (ANOVA), controlling for type 1 error. If particular demographic variables  
29  
30 differ between groups (e.g., age, sex, socioeconomic status) and are related to the outcome  
31  
32 of interest, they will be introduced as a covariate using analysis of covariance (ANCOVA).  
33  
34  
35  
36

37 Within-group analysis for NF1 participants will identify the neuropsychological processes  
38  
39 contributing to ASD symptoms and poor social functioning using (linear or logistic as  
40  
41 appropriate) regressions within each age cohort. Composite variables will be created for  
42  
43 variables that have high collinearity within the same domain. Regression models will be  
44  
45 conducted separately for ASD symptomatology and social functioning as dependent  
46  
47 variables. Only explanatory variables that significantly correlate with the dependent variables  
48  
49 will be entered into each regression model, with a maximum of five predictor variables per  
50  
51 model. Variables with the strongest correlation will be selected for the regression model.  
52  
53  
54  
55

56 Correlation and regression analyses will be used to identify associations between structural  
57  
58 and functional brain markers, with cognitive, behavioural and ASD outcomes. To address the  
59  
60 secondary aim, which is to compare the neuropsychological profiles as well as brain



1  
2  
3 structure and function of children with NF1 and comorbid ASD to idiopathic ASD, statistical  
4 analyses examining group differences (ANCOVA and independent *t*-tests) between the  
5 idiopathic ASD and a subgroup of participants with NF1 and comorbid ASD will be  
6 conducted. Idiopathic ASD and NF1 cases will be matched on age, sex and intelligence.  
7  
8  
9  
10

## 11 12 13 **Sample size**

### 14 *Cognitive and behavioural outcomes*

15  
16 We anticipate NF1 versus TD control between-group effect sizes to range from 0.65-1.0  
17 (Cohen's *d*) based on estimates of general and social cognitive outcomes in previous  
18 studies.<sup>9 11 15</sup> In order to detect a *d*=0.65 difference between the NF1 and TD control groups  
19 on continuous outcomes, with a minimum of 85% power and a significance level of 0.05, we  
20 need to recruit at least 35 children per group in each age cohort (e.g., younger children aged  
21 3-5 years, and a school-aged cohort aged 6-15 years). Within-group analyses performed  
22 within the NF1 group will require a larger sample to attain adequate power. For a multiple  
23 regression, with five independent variables in the model, accounting for an effect size (*f*<sup>2</sup>) of  
24 0.2, power will be sufficiently high ( $\beta=0.8$ ) with a sample size of 70. We thus require a  
25 minimum of 70 participants with NF1 in each age cohort. However, in order to attain a large  
26 enough NF1 with comorbid ASD subgroup (*n*=35) for comparisons with TD control and  
27 idiopathic ASD groups, we estimate approximately 200 children with NF1 will be needed to  
28 be enrolled in the study. This assumes that 17-18% of children with NF1 screened as part of  
29 the study will be diagnosed with comorbid ASD, which is consistent with previous  
30 estimations.<sup>17-19</sup> If the target of 35 is not met, then we will endeavour to recruit extra NF1  
31 participants until a subgroup size of 35 is achieved.  
32  
33  
34  
35  
36  
37  
38  
39  
40  
41  
42  
43  
44  
45  
46  
47  
48  
49  
50  
51

### 52 *Neuroimaging outcomes*

53  
54 Published data demonstrate large effect sizes when comparing DWI and fMRI measures in  
55 individuals with NF1 to TD controls.<sup>85-87</sup> Between-group independent *t*-tests will be  
56 adequately powered ( $\beta=0.80$ ) to detect medium-to-large effect sizes (Cohen's *d*=0.68) with a  
57  
58  
59  
60

1  
2  
3 minimum sample of n=35 per group. For the correlational analyses of DWI, rs-fMRI and  
4 behavioural data within the NF1 sample, power will be sufficiently high ( $\beta=0.8$ ) to detect  
5 moderate association ( $r\geq.4$ ) with a NF1 sample of 45.<sup>88</sup>  
6  
7  
8  
9

### 10 11 *Secondary outcomes*

12  
13 We will recruit 35 idiopathic ASD participants. Sample size is based on (1) ANCOVA power  
14 analyses described above which indicate a sample size of 35 per group is sufficient to  
15 determine group differences on social cognitive measures; and (2) a previously published  
16 neuroimaging study involving 10 idiopathic ASD and 22 control participants which reported  
17 significant group differences in brain structure using structural MRI techniques.<sup>88</sup>  
18  
19  
20  
21  
22  
23  
24  
25

### 26 **Patient and public involvement**

27  
28 Neither patient nor the public were involved in the development of the research questions,  
29 selection of outcome measures, study design or study conduct.  
30  
31  
32  
33

### 34 **ETHICS AND DISSEMINATION**

35  
36 This study has been granted approval by the Human Research Ethics Committee of the  
37 Royal Children's Hospital (HREC35118), Sydney Children's Hospitals Network, and the  
38 Institutional Review Board of the Children's National Health System. Any protocol  
39 modifications will be communicated to the study team and ethics committees. This study will  
40 be conducted in compliance with this protocol, the conditions of the ethics committee  
41 approval, the NHMRC National Statement on ethical Conduct in Human Research (2007),  
42 and the Note for Guidance on Good Clinical Practice (CPMP/ICH-135/95). Written informed  
43 consent will be obtained from all participants. During the informed consent process, a  
44 member of the research team will provide information about the study including the study  
45 objectives, potential risks and benefits, inconveniences, and the participants' rights and  
46 responsibilities. Questions about the study will be addressed in detail. As participants are  
47 minors, written informed consent will be obtained from their parent/legal guardian.  
48  
49  
50  
51  
52  
53  
54  
55  
56  
57  
58  
59  
60

1  
2  
3  
4  
5 The findings of this study will be presented at conferences and published in peer-reviewed  
6 journals. Only aggregated data will be reported in publications and presentations with  
7 individual identifying information removed. The investigator team will write all articles  
8 submitted for peer-reviewed publications and authorship inclusion and order will be guided  
9 by levels of contribution.  
10  
11  
12  
13  
14  
15  
16  
17

## 18 **Discussion**

19  
20 ASD is a highly complex polygenic disorder in which children experience significant  
21 impairments in social interaction, communication and restricted interests and repetitive  
22 behaviours. However, the aetiology of these impairments remains poorly understood, which  
23 limits insights into neurobiological mechanisms and in turn, targeted pharmacological  
24 treatment. Studying ASD in children with NF1 offers a complementary approach to studying  
25 the idiopathic population by allowing us to systematically explore whether there are distinct  
26 neurobiological, cognitive and behavioural ASD phenotypes related to mutation at *NF1*.  
27  
28  
29  
30  
31  
32  
33

34 There will be a number of important novel outcomes from this study. First, it will combine  
35 gold standard diagnostic assessments with extensive cognitive and behavioural phenotyping  
36 to estimate the frequency of ASD and characterise the problem behaviours in children with  
37 NF1 as young as three years of age. Second, this study will characterise the social  
38 phenotype of NF1 and model the interrelationships between various levels of social  
39 functioning (e.g., social interactions, information processing and adjustment), and how  
40 abnormal functioning is associated with ASD symptomatology. Third, this study seeks to  
41 map brain structure and function onto a comprehensive set of cognitive, behavioural, and  
42 functional outcomes, encompassing general and social cognition, ASD symptom profiles,  
43 academic achievement, and adaptive functioning. By identifying the neurobiological and  
44 cognitive factors influencing functional outcomes, there is potential to provide insight into  
45 whether the genetic homogeneity in NF1 results in a unique, more consistent behavioural  
46 and cognitive phenotype than that seen in the idiopathic ASD population. Characterisation of  
47  
48  
49  
50  
51  
52  
53  
54  
55  
56  
57  
58  
59  
60

1  
2  
3 the cognitive, behavioural and neurobiological phenotype in NF1-related ASD may assist in  
4  
5 determining novel targets for future intervention studies aimed at improving social outcomes  
6  
7 in ASD, as well as clinical populations with social difficulties more broadly, to improve patient  
8  
9 outcomes. Finally, identifying neural correlates of social dysfunction and ASD in NF1 may  
10  
11 provide researchers with valid surrogate endpoints for clinical trials, which would be  
12  
13 particularly useful in proof of concept pilot studies and to assist optimising aspects of trial  
14  
15 design such as dose refinement.  
16  
17  
18  
19  
20  
21  
22  
23  
24  
25  
26  
27  
28  
29  
30  
31  
32  
33  
34  
35  
36  
37  
38  
39  
40  
41  
42  
43  
44  
45  
46  
47  
48  
49  
50  
51  
52  
53  
54  
55  
56  
57  
58  
59  
60

For peer review only

**Authors' contributions**

JMP, NAP, KSW, BB and KNN developed the original concept of the study, wrote the grant applications and drafted the original protocol and methodology. KMH, AC, MR, AM, VA, TS, KW, MSK, MLS, FL, JL, CR, GD and MK provided additional advice on the study design, analysis techniques and/or statistical methods. JMP, KMH and NAP drafted this protocol paper. All authors commented on the final preparation of the protocol and have read and approved the final manuscript.

**Funding statement**

This work was supported by a US Department of Defense Investigator Initiated Research Award and an Exploration-Hypothesis Development Award as part of the Neurofibromatosis Research Program, respective grant numbers W81XWH-15-1-0619 & W81XWH-16-1-0408; a Murdoch Children's Research Institute Clinician Scientist Fellowship awarded to Dr Payne; a NHMRC Postgraduate Scholarship awarded to Ms Chisholm; and the Children's Tumour Foundation in Australia.

**Competing interests**

All authors declare they have no competing interests.

**Word count:** 4142

**REFERENCES**

1. Tordjman S, Somogyi E, Coulon N, et al. Gene × Environment interactions in autism spectrum disorders: role of epigenetic mechanisms. *Front Psychiatry* 2014;5:53.
2. Sandin S, Lichtenstein P, Kuja-Halkola R, et al. The heritability of autism spectrum disorder. *JAMA* 2017;318:1182-4.
3. Tick B, Bolton P, Happé F, et al. Heritability of autism spectrum disorders: a meta-analysis of twin studies. *J Child Psychol Psychiatry* 2016;57:585-95.
4. Anney R, Klei L, Pinto D, et al. Individual common variants exert weak effects on the risk for autism spectrum disorders. *Human Mol Genet* 2012;21:4781-92.
5. Buxbaum JD, Daly MJ, Devlin B, et al. The autism sequencing consortium: large-scale, high-throughput sequencing in autism spectrum disorders. *Neuron* 2012;76:1052-6.
6. Pinto D, Delaby E, Merico D, et al. Convergence of genes and cellular pathways dysregulated in autism spectrum disorders. *Am J Hum Genet* 2014;94:677-94.
7. Winden KD, Ebrahimi-Fakhari D, Sahin M. Abnormal mTOR activation in autism. *Annu Rev Neurosci* 2018;41:1-23.
8. Evans DG, Howard E, Giblin C, et al. Birth incidence and prevalence of tumor-prone syndromes: Estimates from a UK family genetic register service. *Am J Med Genet A* 2010;152A:327-32.
9. Hyman SL, Shores EA, North KN. The nature and frequency of cognitive deficits in children with neurofibromatosis type 1. *Neurology* 2005;65:1037-44.
10. Lehtonen A, Howie E, Trump D, et al. Behaviour in children with neurofibromatosis type 1: cognition, executive function, attention, emotion, and social competence. *Dev Med Child Neurol* 2012;55:111-25.
11. Chisholm AK, Anderson VA, Pride NA, et al. Social function and autism spectrum disorder in children and adults with neurofibromatosis type 1: a systematic review and meta-analysis. *Neuropsychol Rev* 2018;28:317-40.

12. Lewis AK, Porter MA, Williams TA, et al. Facial emotion recognition, face scan paths, and face perception in children with neurofibromatosis type 1. *Neuropsychology* 2017;31:361-70.
13. Allen T, Willard VW, Anderson LM, et al. Social functioning and facial expression recognition in children with neurofibromatosis type 1. *J Intellect Disabil Res* 2016;60:282-93.
14. Huijbregts S, Jahja R, de Sonnevile L, et al. Social information processing in children and adolescents with neurofibromatosis type 1. *Dev Med Child Neurol* 2010;52:620-5.
15. Payne JM, Porter MA, Pride NA, et al. Theory of mind in children with neurofibromatosis type 1. *Neuropsychology* 2016;30:439-48.
16. Morris SM, Acosta MT, Garg S, et al. Disease burden and symptom structure of autism in neurofibromatosis type 1: a study of the International NF1-ASD Consortium Team (INFACT). *JAMA Psychiatry* 2016;73:1276-84.
17. Plasschaert E, Descheemaeker MJ, Van Eylen L, et al. Prevalence of autism spectrum disorder symptoms in children with neurofibromatosis type 1. *Am J Med Genet Part B* 2015;168B:72-80.
18. Eijk S, Mous SE, Dieleman GC, et al. Autism spectrum disorder in an unselected cohort of children with neurofibromatosis type 1 (NF1). *J Autism Dev Disord* 2018;48:2278-85.
19. Garg S, Green J, Leadbitter K, et al. Neurofibromatosis type 1 and autism spectrum disorder. *Pediatrics* 2013;132:e1642-e48.
20. Lai MC, Lombardo MV, Baron-Cohen S. Autism. *Lancet* 2014;383:896-910.
21. Noll RB, Reiter-Purtill J, Moore BD, et al. Social, emotional, and behavioral functioning of children with NF1. *Am J Med Genet Part A* 2007;143A:2261-73.
22. Payne JM, Hyman SL, Shores EA, et al. Assessment of executive function and attention in children with neurofibromatosis type 1: relationships between cognitive measures and real-world behavior. *Child Neuropsychol* 2011;17:313-29.

- 1  
2  
3 23. Wang DL, Smith KB, Esparza S, et al. Emotional functioning of patients with  
4  
5 neurofibromatosis tumor suppressor syndrome. *Genet Med* 2012;14:977-82.  
6  
7 24. Beauchamp MH, Anderson V. SOCIAL: an integrative framework for the development of  
8  
9 social skills. *Psychol Bull* 2010;136:39-64.  
10  
11 25. Craig F, Margari F, Legrottaglie AR, et al. A review of executive function deficits in  
12  
13 autism spectrum disorder and attention-deficit/hyperactivity disorder. *Neuropsychiatr*  
14  
15 *Dis Treat* 2016;12:1191-202.  
16  
17 26. Garg S, Plasschaert E, Descheemaeker MJ, et al. Autism spectrum disorder profile in  
18  
19 neurofibromatosis type I. *J Autism Dev Disord* 2015;45:1649-57.  
20  
21 27. Christensen DL, Baio J, Van Naarden Braun K, et al. Prevalence and characteristics of  
22  
23 autism spectrum disorder among children aged 8 years--Autism and Developmental  
24  
25 Disabilities Monitoring Network, 11 Sites, United States, 2012. *MMWR Surveill*  
26  
27 *Summ* 2016;65:1-23.  
28  
29 28. Garg S, Heuvelman H, Huson S, et al. Sex bias in autism spectrum disorder in  
30  
31 neurofibromatosis type 1. *J Neurodev Disord* 2016;8:26.  
32  
33 29. Bent CA, Dissanayake C, Barbaro J. Mapping the diagnosis of autism spectrum  
34  
35 disorders in children aged under 7 years in Australia, 2010-2012. *Med J Aust*  
36  
37 2015;202:317-20.  
38  
39 30. Klein-Tasman BP, Janke KM, Luo W, et al. Cognitive and psychosocial phenotype of  
40  
41 young children with neurofibromatosis-1. *J Int Neuropsychol Soc* 2014;20:88-98.  
42  
43 31. Pennington BF, Welsh M. Neuropsychology and developmental psychopathology. *J*  
44  
45 *Child Psychol Psychiatry* 1995;37:51-87.  
46  
47 32. Wang Y, Kim E, Wang X, et al. ERK inhibition rescues defects in fate specification of  
48  
49 Nf1-deficient neural progenitors and brain abnormalities. *Cell* 2012;150:816-30.  
50  
51 33. Payne JM, Moharir MD, Webster R, et al. Brain structure and function in  
52  
53 neurofibromatosis type 1: current concepts and future directions. *J Neurol Neurosurg*  
54  
55 *Psychiatry* 2010;81:304-9.  
56  
57  
58  
59  
60



- 1  
2  
3 34. Violante IR, Patricio M, Bernardino I, et al. GABA deficiency in NF1: a multimodal [11C]-  
4 flumazenil and spectroscopy study. *Neurology* 2016;87:897-904.  
5  
6  
7 35. Cui Y, Costa RM, Murphy GG, et al. Neurofibromin regulation of ERK signaling  
8 modulates GABA release and learning. *Cell* 2008;135:549-60.  
9  
10  
11 36. National Institutes of Health Consensus Development Conference. Conference  
12 Statement. Neurofibromatosis. *Arch Neurol* 1988;45:575-8.  
13  
14  
15 37. Payne JM, North KN. Neurofibromatosis type 1. In: S Goldstein, CR Reynolds Editors.  
16 Handbook of Neurodevelopmental and Genetic Disorders in Children, 2nd Edition.  
17 New York: Guilford Press 2010:322-37.  
18  
19  
20 38. Wechsler D. Wechsler Preschool and Primary Scale of Intelligence, 4th Edition. San  
21 Antonio, Tx: Pearson 2012.  
22  
23  
24 39. Wechsler D. Wechsler Intelligence Scale for Children, 5th Edition: Pearson Assessment  
25 2016.  
26  
27  
28 40. Manly T, Robertson IH, Anderson V, et al. The Test of Everyday Attention for Children.  
29 London: Battley Brothers 1999.  
30  
31  
32 41. Espy KA. The shape school: assessing executive function in preschool children. *Dev*  
33 *Neuropsychol* 1997;13:495-9.  
34  
35  
36 42. Korkman M, Kirk U, Kemp S. The NEPSY Second Edition (NEPSY II) Scoring Manual.  
37 Bloomington, MN: Pearson 2007.  
38  
39  
40 43. Wechsler D. Wechsler Intelligence Scales for Children, 5th Edition. San Antonio: The  
41 Psychological Corporation 2016.  
42  
43  
44 44. Welsh MC, Pennington BF, Grossier DB. A normative developmental study of executive  
45 function: a window on prefrontal function in children. *Dev Neuropsychol* 1991;7:131-  
46 49.  
47  
48  
49 45. Wechsler D. Wechsler Individual Achievement Test, 2nd Edition. New York:  
50 Psychological Corporation 2002.  
51  
52  
53 46. Benton AL, Sivan AB, Hamsher K, et al. Contributions for neuropsychological  
54 assessment 2nd Edition. Orlando, FL: Psychological Assessment Resources 1994.  
55  
56  
57  
58  
59  
60

- 1  
2  
3 47. Baron-Cohen S, Wheelwright S, Scahill V, et al. Are intuitive physics and intuitive  
4  
5 psychology independent? A test with children with Asperger Syndrome. *J Dev Learn*  
6  
7 *Disord* 2001;5:47-78.  
8
- 9 48. Baron-Cohen S, O'Riordan M, Jones R, et al. A new test of social sensitivity: detection of  
10  
11 faux pas in normal children and children with Asperger syndrome. *J Autism Devel*  
12  
13 *Disord* 1999;29:407-18.  
14
- 15 49. Happé FGE. An advanced test of theory of mind: understanding of story characters'  
16  
17 thoughts and feelings by able autistic, mentally handicapped and normal children and  
18  
19 adults. *J Autism Devel Disord* 1994;24:129-54.  
20  
21
- 22 50. Wiig EH, Secord W, Semel E. Clinical Evaluation of Language Fundamentals -  
23  
24 Preschool, 2nd Edition (Australian). Marrickville NSW Australia: Harcourt  
25  
26 Assessment 2006.  
27
- 28 51. Semel E, Wiig EH, Secord WA. Clinical Evaluation of Language Fundamentals, 4th  
29  
30 Edition. Sydney: Harcourt Assessment 2003.  
31
- 32 52. Constantino JN, Gruber CP. Social Responsiveness Scale, Second Edition. Los  
33  
34 Angeles: Western Psychological Services 2012.  
35
- 36 53. Conners CK. Conners' Rating Scales-revised. New York: Multi-Health Systems Inc.  
37  
38 1997.  
39
- 40 54. Conners CK. Conners 3rd Edition. Toronto: Multi-Health Systems Inc 2009.  
41  
42
- 43 55. Gioia GA, Espy KA, Isquith PK. Behavior Rating Inventory of Executive Function,  
44  
45 Preschool Version. Lutz, FL: Psychological Assessment Resources, Inc 2003.  
46
- 47 56. Gioia GA, Isquith PK, Guy SC, et al. Behavior Rating Inventory of Executive Function:  
48  
49 Professional Manual. Odessa: PAR, Inc 2000.  
50
- 51 57. Harrison P, Oakland T. Adaptive Behavior Assessment System, Third Edition 2015.  
52
- 53 58. Gresham FM, Elliott SN. Social Skills Improvement System Rating Scales. Minneapolis:  
54  
55 NCS Pearson 2008.  
56
- 57 59. Dunn W. Sensory Profile-2: Pearson UK 2014.  
58  
59  
60

- 1  
2  
3 60. Achenbach TM, Rescorla LA. Manual for the ASEBA Preschool Forms and Profiles.  
4  
5 Burlington, VT: University of Vermont Department of Psychiatry 2000.  
6  
7 61. Achenbach TM, Rescorla LA. Manual for the ASEBA School-Age Forms and Profiles.  
8  
9 Burlington, VT: University of Vermont, Research Center for Children, Youth, and  
10  
11 Families 2001.  
12  
13 62. Bishop DVM. Children's Communication Checklist-2. San Antonio, TX: Pearson 2006.  
14  
15 63. Le Couteur A, Lord C, Rutter M. The Autism Diagnostic Interview-Revised (ADI-R). Los  
16  
17 Angeles, CA: Western Psychological Services 2003.  
18  
19 64. Rutter M, Le Couteur A, Lord C. ADI-R: Autism Diagnostic Interview-Revised (ADI-R).  
20  
21 Los Angeles, CA: Western Psychological Services 2003.  
22  
23 65. Lord C, Rutter M, DiLavore PC, et al. Autism diagnostic observation schedule, second  
24  
25 edition: ADOS-2. Torrance: Western Psychological Services 2012.  
26  
27 66. Risi S, Lord C, Gotham K, et al. Combining information from multiple sources in the  
28  
29 diagnosis of autism spectrum disorders. *J Am Acad Child and Adolesc Psychiatry*  
30  
31 2006;45:1094-103.  
32  
33 67. Silk TJ, Vilgis V, Adamson C, et al. Abnormal asymmetry in frontostriatal white matter in  
34  
35 children with attention deficit hyperactivity disorder. *Brain Imaging Behav*  
36  
37 2016;10:1080-9.  
38  
39 68. Tisdall MD, Hess AT, Reuter M, et al. Volumetric navigators for prospective motion  
40  
41 correction and selective reacquisition in neuroanatomical MRI. *Mag resonan Med*  
42  
43 2012;68:389-99.  
44  
45 69. van der Kouwe AJW, Benner T, Salat DH, et al. Brain morphometry with multiecho  
46  
47 MPRAGE. *NeuroImage* 2008;40:559-69.  
48  
49 70. Van Es S, North KN, McHugh K, et al. MRI findings in children with neurofibromatosis  
50  
51 type 1: a prospective study. *Pediatr Radiol* 1996;26:478-87.  
52  
53 71. Sevick RJ, Barkovich AJ, Edwards MS, et al. Evolution of white matter lesions in  
54  
55 neurofibromatosis type 1: MR findings. *Am J Roentgenol* 1992;159:171-5.  
56  
57  
58  
59  
60

- 1  
2  
3 72. Lopes Ferraz Filho JR, Munis MP, Soares Souza A, et al. Unidentified bright objects on  
4 brain MRI in children as a diagnostic criterion for neurofibromatosis type 1. *Pediatr*  
5 *Radiol* 2008;38:305-10.  
6  
7  
8  
9 73. DiPaolo DP, Zimmerman RA, Rorke LB, et al. Neurofibromatosis type 1: pathologic  
10 substrate of high-signal-intensity foci in the brain. *Radiology* 1995;195:721-4.  
11  
12  
13 74. Hagmann P, Jonasson L, Maeder P, et al. Understanding diffusion MR imaging  
14 techniques: from scalar diffusion-weighted imaging to diffusion tensor imaging and  
15 beyond. *Radiographics* 2006;26:S205-23.  
16  
17  
18 75. Le Bihan D, Mangin JF, Poupon C, et al. Diffusion tensor imaging: concepts and  
19 applications. *J Mag Reson Imaging* 2001;13:534-46.  
20  
21  
22 76. Auerbach EJ, Xu J, Yacoub E, et al. Multiband accelerated spin-echo echo planar  
23 imaging with reduced peak RF power using time-shifted RF pulses. *Mag Reson Med*  
24 2013;69:1261-7.  
25  
26  
27 77. Xu J, Moeller S, Auerbach EJ, et al. Evaluation of slice accelerations using multiband  
28 echo planar imaging at 3 T. *NeuroImage* 2013;83:991-1001.  
29  
30  
31 78. Tomson SN, Schreiner MJ, Narayan M, et al. Resting state functional MRI reveals  
32 abnormal network connectivity in neurofibromatosis 1. *Hum Brain Mapp*  
33 2015;36:4566-81.  
34  
35  
36 79. Shilyansky C, Lee YS, Silva AJ. Molecular and cellular mechanisms of learning  
37 disabilities: a focus on NF1. *Annu Rev Neurosci* 2010;33:221-43.  
38  
39  
40 80. Goncalves J, Violante IR, Sereno J, et al. Testing the excitation/inhibition imbalance  
41 hypothesis in a mouse model of the autism spectrum disorder: in vivo  
42 neurospectroscopy and molecular evidence for regional phenotypes. *Mol Autism*  
43 2017;8:47.  
44  
45  
46 81. Molosh AI, Johnson PL, Spence JP, et al. Social learning and amygdala disruptions in  
47 Nf1 mice are rescued by blocking p21-activated kinase. *Nat Neurosci* 2014;17:1583-  
48 90.  
49  
50  
51  
52  
53  
54  
55  
56  
57  
58  
59  
60

- 1  
2  
3 82. Mullins PG, McGonigle DJ, O'Gorman RL, et al. Current practice in the use of MEGA-  
4 PRESS spectroscopy for the detection of GABA. *NeuroImage* 2014;86:43-52.  
5  
6  
7 83. Schurz M, Radua J, Aichhorn M, et al. Fractionating theory of mind: a meta-analysis of  
8 functional brain imaging studies. *Neurosci Biobehav Rev* 2014;42:9-34.  
9  
10  
11 84. Bzdok D, Schilbach L, Vogeley K, et al. Parsing the neural correlates of moral cognition:  
12 ALE meta-analysis on morality, theory of mind, and empathy. *Brain Struct Funct*  
13 2012;217:783-96.  
14  
15  
16 85. Zamboni SL, Loenneker T, Boltshauser E, et al. Contribution of diffusion tensor MR  
17 imaging in detecting cerebral microstructural changes in adults with  
18 neurofibromatosis type 1. *Am J Neuroradiol* 2007;28:773-76.  
19  
20  
21 86. Shilyansky C, Karlsgodt KH, Cummings DM, et al. Neurofibromin regulates corticostriatal  
22 inhibitory networks during working memory performance. *P Natl Acad Sci USA*  
23 2010;107:13141-6.  
24  
25  
26 87. van Engelen SJPM, Krab LC, Moll HA, et al. Quantitative differentiation between healthy  
27 and disordered brain matter in patients with neurofibromatosis type 1 using diffusion  
28 tensor imaging. *Am J Neuroradiol* 2008;29:816-22.  
29  
30  
31 88. Faul F, Erdfelder E, Buchner A, et al. Statistical power analysis using G\*Power 3.1:  
32 Tests for correlation and regression analyses. *Behav Res Methods* 2009;41:1149-60.  
33  
34  
35  
36  
37  
38  
39  
40  
41  
42  
43  
44  
45  
46  
47  
48  
49  
50  
51  
52  
53  
54  
55  
56  
57  
58  
59  
60

1  
2  
3  
4  
5  
6  
7  
8  
9  
10  
11  
12  
13  
14  
15  
16  
17  
18  
19  
20  
21  
22  
23  
24  
25  
26  
27  
28  
29  
30  
31  
32  
33  
34  
35  
36  
37  
38  
39  
40  
41  
42  
43  
44  
45  
46  
47  
48  
49  
50  
51  
52  
53  
54  
55  
56  
57  
58  
59  
60

**Figure 1:** Diagram of study design for all groups.

For peer review only

Table 1: Cognitive assessment measures

| Domain                             | Measure                                               | Description                                                                                                                                          | Cohort |
|------------------------------------|-------------------------------------------------------|------------------------------------------------------------------------------------------------------------------------------------------------------|--------|
| <i>Intelligence</i>                |                                                       |                                                                                                                                                      |        |
| General intelligence               | WPPSI IV <sup>38</sup>                                | 10 subtests providing 5 indices and full scale IQ                                                                                                    | Y      |
|                                    | WISC-V <sup>39</sup>                                  | 10 subtests providing 5 indices and full scale IQ                                                                                                    | S      |
| <i>Attention/executive</i>         |                                                       |                                                                                                                                                      |        |
| Attentional control                |                                                       |                                                                                                                                                      |        |
| Selective attention                | TEA-Ch Sky Search <sup>40</sup>                       | Assessing the ability to selectively attend to and identify 20 visual targets amongst distractors                                                    | S      |
| Sustained attention                | TEA-Ch Score! <sup>40</sup>                           | 10 trials assessing the ability to sustain attention by mentally counting aurally administered tones                                                 | S      |
| Response inhibition                | Shape School <sup>41</sup>                            | 4 conditions (each with 15 items) assessing inhibition, task-switching and working memory abilities in a shape and colour naming task                | Y      |
|                                    | NESPY-II Inhibition <sup>42</sup>                     | 6 items assessing the ability to inhibit automatic responses in favour of novel responses while quickly and efficiently naming shapes and directions | S      |
| Cognitive flexibility/goal setting |                                                       |                                                                                                                                                      |        |
| Working memory                     | From WPPSI IV <sup>38</sup>                           | 2 core subtests assessing visual working memory                                                                                                      | Y      |
|                                    | From WISC-V <sup>43</sup>                             | 2 core subtests assessing visual working memory and verbal working memory                                                                            | S      |
| Planning                           | Tower of Hanoi <sup>44</sup>                          | 6 items assessing set shifting, response inhibition, working memory and ability to hold a set of rules in mind in order to reach an end-state goal   | Y      |
| Attentional shifting               | TEA-Ch Creature Counting <sup>40</sup>                | 7 trials assessing the ability to accurately switch and redirect attention to count up/down                                                          | S      |
| <i>Academics</i>                   | WIAT-II Abbreviated <sup>45</sup>                     | 3 subtests assessing numerical operations, spelling, and single word reading                                                                         | S      |
| <i>Social cognition</i>            |                                                       |                                                                                                                                                      |        |
| Faces/emotion perception           |                                                       |                                                                                                                                                      |        |
| Emotion perception                 | NEPSY-II Affect Recognition <sup>42</sup>             | 36 items assessing the ability to match facial expressions from photographs of children's faces                                                      | Y, S   |
| Face perception                    | Benton Facial Recognition Test <sup>46</sup>          | 13 items assessing the ability to recognise a target face from a selection of distractors                                                            | S      |
| Mentalising/theory of mind         |                                                       |                                                                                                                                                      |        |
|                                    | NEPSY-II ToM <sup>42</sup>                            | 21 items assessing the ability to comprehend perspectives, intentions and beliefs of another person                                                  | Y, S   |
|                                    | Reading the Mind in the Eyes Test-Child <sup>47</sup> | 28 items assessing the ability to determine a person's thoughts or feelings based on a picture of only their eyes                                    | S      |
|                                    | Faux Pas Task <sup>48</sup>                           | 20 short stories assessing the ability to identify a social faux pas                                                                                 | S      |

1  
2  
3  
4  
5  
6  
7  
8  
9  
10  
11  
12  
13  
14  
15  
16  
17  
18  
19  
20  
21  
22  
23  
24  
25  
26  
27  
28  
29  
30  
31  
32  
33  
34  
35  
36  
37  
38  
39  
40  
41  
42  
43  
44  
45  
46

|                      |                                                      |                                                                                                                                                                                     |   |
|----------------------|------------------------------------------------------|-------------------------------------------------------------------------------------------------------------------------------------------------------------------------------------|---|
|                      | Strange Stories <sup>49</sup>                        | 14 short stories assessing ability to attribute mental states (e.g., desires, beliefs or intentions) or perceive what a character knows, as well as 4 control comprehension stories | S |
| <i>Communication</i> |                                                      |                                                                                                                                                                                     |   |
| Expressive language  | CELF-Preschool-2 <sup>50</sup>                       | 2 subtests assessing knowledge of grammatical rules in a sentence completion task and the ability to name objects, people and activities                                            | Y |
|                      | CELF-4 Formulated Sentences <sup>51</sup>            | 28 items assessing the ability to formulate semantically and grammatically correct spoken sentences using given words (e.g., car), based on an illustration                         | S |
| Receptive language   | CELF-Preschool-2 <sup>50</sup>                       | 22 items assessing the ability to interpret spoken sentences of increasing length and complexity                                                                                    | Y |
|                      | NEPSY-II Comprehension of Instructions <sup>42</sup> | 33 items assessing a child's ability to comprehend and follow multistep instructions of increasing complexity                                                                       | S |

---

Note: Y = young cohort; S = School age cohort WPPSI IV = Wechsler Preschool and Primary Scale of Intelligence, 4<sup>th</sup> Edition; WISC-V = Wechsler Intelligence Scale for Children, 5<sup>th</sup> Edition; NEPSY = A Developmental Neuropsychological Assessment; TEA-Ch = Test of Everyday Attention for Children; WIAT-II = Wechsler Individual Achievement Test, 2<sup>nd</sup> Edition; ToM = Theory of Mind; CELF = Clinical Evaluation of Language Fundamentals.



Table 2: Behavioural and adaptive questionnaire measures

| Domain                                         | Measure                          | Description                                                                                                                                                                                                                                   | Cohort |
|------------------------------------------------|----------------------------------|-----------------------------------------------------------------------------------------------------------------------------------------------------------------------------------------------------------------------------------------------|--------|
| <i>ASD Symptomatology</i>                      | SRS-2 <sup>52</sup>              | 65 items assessing the presence and severity of ASD symptoms including social awareness, social cognition, social communication, social motivation, and restricted interests and repetitive behaviour                                         | Y, S   |
| <i>ADHD Symptomatology</i>                     | CADS <sup>53</sup>               | 26 items assessing ADHD symptoms of impulsivity/hyperactivity and inattention                                                                                                                                                                 | Y      |
|                                                | Conners 3 <sup>54</sup>          | 110 items assessing ADHD symptom and comorbid disorders including oppositional defiant and conduct problems, executive functions, learning problems, peer relations, and defiance/aggression                                                  | S      |
| <i>Executive Function</i>                      | BRIEF-Preschool <sup>55</sup>    | 63 items assessing executive functions within the home environment, including working memory, mental set shifting, response inhibition, emotional control, and planning/organisation                                                          | Y      |
|                                                | BRIEF <sup>56</sup>              | 86 items assessing executive functions in the home environment, including working memory, mental set shifting, response inhibition, emotional control, planning/organisation, organisation of materials, initiation, and behaviour monitoring | S      |
| <i>Adaptive Functioning</i>                    | ABAS-3: 0-5 years <sup>57</sup>  | 241 items assessing adaptive functioning skills, including communication, community use, pre-academics, home living, health and safety, leisure, self-care, self-direction, and social abilities                                              | Y      |
|                                                | ABAS-3: 5-21 years <sup>57</sup> | 232 items assessing adaptive functioning skills, including communication, community use, functional academics, home living, health and safety, leisure, self-care, self-direction, and social abilities                                       | S      |
| <i>Social Skills</i>                           | SSIS Rating Scale <sup>58</sup>  | 79 items assessing social skills, problem behaviours, and academic competence                                                                                                                                                                 | Y, S   |
| <i>Sensory Processing</i>                      | Sensory Profile 2 <sup>59</sup>  | 86 items assessing sensory processing, including auditory, visual, taste/smell, movement, body position, touch, plus behavioural skills including activity levels and emotional/social skills                                                 | Y, S   |
| <i>Behavioural, Emotional, Social Problems</i> | CBCL: 1.5 – 5years <sup>60</sup> | 100 items assessing internalising and externalising problems, emotional reactivity, anxiety/depression, somatic complaints, withdrawal, sleep problems, attention problems and aggressive behaviours                                          | Y      |
|                                                | CBCL: 6-18 years <sup>61</sup>   | 113 items assessing internalising and externalising problems, emotional reactivity, anxiety/depression, somatic complaints, withdrawal, sleep problems, attention problems and aggressive behaviours                                          | S      |

*Pragmatic Language*

CCC-2<sup>62</sup>

70 items assessing speech, syntax, semantics, coherence, inappropriate initiation, stereotyped language, use of context, nonverbal communication, social relations, and interests

Y, S

---

Note: SRS-2 = Social Responsiveness Scale, 2<sup>nd</sup> Edition, CADS = Conners' Attention Deficit Hyperactivity Disorder Scales; BRIEF = Behavior Rating Inventory of Executive Functions; ABAS-3 = Adaptive Behaviour Assessment System, 3<sup>rd</sup> Edition; SSIS = Social Skills Improvement System; CBCL = Child Behavior Checklist; CCC-2 = Children's Communication Checklist, 2<sup>nd</sup> Edition.

For peer review only

1  
2  
3  
4  
5  
6  
7  
8  
9  
10  
11  
12  
13  
14  
15  
16  
17  
18  
19  
20  
21  
22  
23  
24  
25  
26  
27  
28  
29  
30  
31  
32  
33  
34  
35  
36  
37  
38  
39  
40  
41  
42  
43  
44  
45  
46

Table 3: Brain MRI sequence parameters

| Sequence<br>Type                   | T1        |                        | T2        | DWI       |           |           |                 | fMRI      |                 | MRS*      |           |
|------------------------------------|-----------|------------------------|-----------|-----------|-----------|-----------|-----------------|-----------|-----------------|-----------|-----------|
|                                    | MPRAGE    | MEMPRAGE               | SPACE     | Shell 1   | Shell 2   | Shell 3   | Blip<br>up/down | rs-fMRI   | Blip<br>up/down | rTPJ      | PFC       |
| TR (ms)                            | 2100      | 2690                   | 3200      | 3300      | 3300      | 3300      | 3300            | 1500      | 3980            | 2000      | 2000      |
| TE (ms)                            | 2.22      | 2.14/3.8/<br>5.48/7.15 | 458       | 71.0      | 71.0      | 71.0      | 71.0            | 33.0      | 33.0            | 68.00     | 68.00     |
| TI (ms)                            | 1000      | 1650                   | 0         | -         | -         | -         | -               | -         | -               | -         | -         |
| Flip angle (degrees)               | 8         | 8                      | -         | 85        | 85        | 85        | 85              | 85        | 85              | -         | -         |
| Slices                             | 208       | 192                    | 208       | 64        | 64        | 64        | 64              | 60        | 60              | -         | -         |
| Voxel size (mm <sup>3</sup> )      | 0.80      | 0.90                   | 0.80      | 2.40      | 2.40      | 2.40      | 2.40            | 2.50      | 2.50            | 30        | 30        |
| FoV read (mm)                      | 256       | 254                    | 256       | 260       | 260       | 260       | 260             | 255       | 255             | -         | -         |
| FoV phase (%)                      | 93.8      | 100                    | 100       | 100       | 100       | 100       | 100             | 100       | 100             | -         | -         |
| Matrix                             | 320 x 320 | 288x288                | 320 x 320 | 110 x 110 | 110 x 110 | 110 x 110 | 110 x 110       | 104 x 104 | 104 x 104       | -         | -         |
| Band width (Hz/Px)                 | 220       | 790                    | 744       | 2392      | 2392      | 2392      | 2392            | 1718      | 1718            | 1850      | 1850      |
| Echo spacing (ms)                  | 6.30      | 9.20                   | 3.52      | 0.50      | 0.50      | 0.50      | 0.50            | 0.67      | 0.67            | -         | -         |
| Orientation                        | S         | S                      | S         | T         | T         | T         | T               | T         | T               | T         | T         |
| B value (s/mm <sup>2</sup> )       | -         | -                      | -         | 2800      | 2000      | 1000      | 0               | -         | -               | -         | -         |
| No. directions/b=0 s               | -         | -                      | -         | 63/6      | 45/5      | 25/5      | 6               | -         | -               | -         | -         |
| Multi-band factor                  | -         | -                      | -         | 2         | 2         | 2         | 2               | 3         | 3               | -         | -         |
| Parallel imaging -<br>GRAPPA       | 2         | 2                      | 2         | 2         | 2         | 2         | 2               | 2         | 2               | -         | -         |
| Acquisition time                   | 5 m 48 s  | 3 m 44 s               | 3 m 52 s  | 3 m 49 s  | 3 m 6 s   | 2 m       | 21 s (x 2)      | 6 m 57 s  | 28 s (x 2)      | 4 m 36 s  | 4 m 36 s  |
| Averages                           | -         | -                      | -         | -         | -         | -         | -               | -         | -               | 64x2      | 64x2      |
| Odd /even inversion<br>pulse (ppm) | -         | -                      | -         | -         | -         | -         | -               | -         | -               | 7.50/1.90 | 7.50/1.90 |

Note: rTPJ = right temporoparietal junction; PFC = prefrontal cortex; S = sagittal; T = transversal; TR = repetition time; TE = echo time; TI = inversion time; FoV = field of view; s = seconds; ms = milliseconds; mm<sup>3</sup> = millimetres cubed; mm = millimetres; mm<sup>2</sup> = millimetres squared ; Hz = hertz; GRAPPA = GeneRalized Autocalibrating Partial Parallel Acquisition; Px = pixels; ppm = parts per million. \*MCRi site only

1  
2  
3  
4  
5  
6  
7  
8  
9  
10  
11  
12  
13  
14  
15  
16  
17  
18  
19  
20  
21  
22  
23  
24  
25  
26  
27  
28  
29  
30  
31  
32  
33  
34  
35  
36  
37  
38  
39  
40  
41  
42  
43  
44  
45  
46  
47  
48  
49  
50  
51  
52  
53  
54  
55  
56  
57  
58  
59  
60

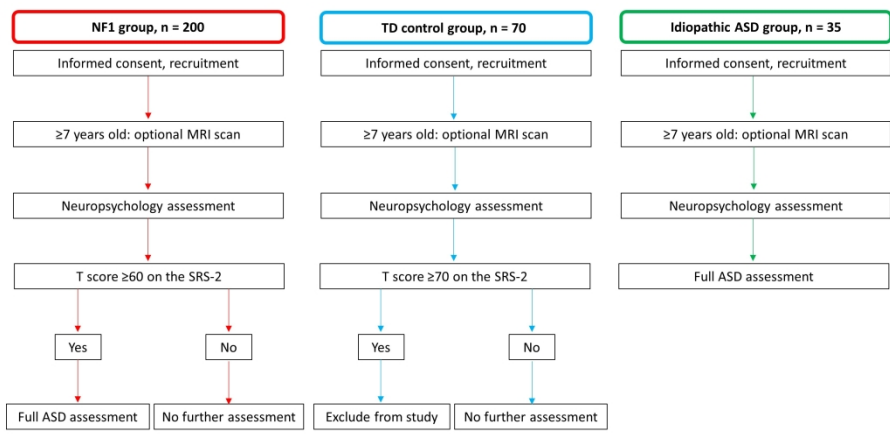

Figure 1: Diagram of study design for all groups.

338x190mm (300 x 300 DPI)
